# Supplementary material for: The Group Contribution to the Function Derived from Density and Speed-of-Sound Measurements for Glymes in N,N-Dimethylformamide + Water Mixtures
Source: MDPI journal article supplement (doi:10.3390/molecules28041519), 2023-02-04
Supplement: s1 [file s1]

**The group contribution to the function derived from density and speed of sound measurements for glymes in the *N,N*-dimethylformamide + water mixtures.**

Małgorzata Józwiak<sup>a\*</sup>, Marlena Komudzińska<sup>a</sup>, Magdalena Tyczyńska<sup>a</sup>

<sup>a</sup>Department of Physical Chemistry, Faculty of Chemistry, University of Lodz, Pomorska 165, 90-236 Lodz, Poland

\*corresponding author: malgorzata.jozwiak@chemia.uni.lodz.pl

**Supplementary Materials**

**Table S1.** Density of the pentaglyme + DMF + W solution at pressure  $p = 0.100 \pm 0.005$ MPa.

|               |                                     | $\rho / (\text{kg} \cdot \text{m}^{-3})$ |          |          |          |
|---------------|-------------------------------------|------------------------------------------|----------|----------|----------|
|               | $m/\text{mol} \cdot \text{kg}^{-1}$ | 293.15 K                                 | 298.15 K | 303.15 K | 308.15 K |
| $x_w = 1.000$ | 0.00000                             | 998.204                                  | 997.050  | 995.659  | 994.039  |
|               | 0.02720                             | 998.914                                  | 997.734  | 996.316  | 994.674  |
|               | 0.04899                             | 999.482                                  | 998.280  | 996.841  | 995.180  |
|               | 0.07406                             | 1000.132                                 | 998.906  | 997.442  | 995.758  |
|               | 0.12010                             | 1001.321                                 | 1000.049 | 998.535  | 996.812  |
|               | 0.17162                             | 1002.640                                 | 1001.320 | 999.748  | 997.978  |
|               | 0.19593                             | 1003.261                                 | 1001.914 | 1000.316 | 998.523  |
|               | 0.23202                             | 1004.177                                 | 1002.793 | 1001.155 | 999.326  |
|               | 0.26652                             | 1005.047                                 | 1003.631 | 1001.950 | 1000.087 |
| $x_w = 0.980$ | 0.00000                             | 997.773                                  | 996.268  | 994.552  | 992.641  |
|               | 0.02290                             | 998.397                                  | 996.867  | 995.129  | 993.196  |
|               | 0.05007                             | 999.131                                  | 997.572  | 995.808  | 993.849  |
|               | 0.07274                             | 999.739                                  | 998.155  | 996.369  | 994.388  |
|               | 0.12350                             | 1001.084                                 | 999.445  | 997.611  | 995.578  |
|               | 0.17066                             | 1002.312                                 | 1000.624 | 998.743  | 996.663  |
|               | 0.19792                             | 1003.012                                 | 1001.298 | 999.390  | 997.280  |
|               | 0.22953                             | 1003.819                                 | 1002.070 | 1000.131 | 997.988  |
|               | 0.26544                             | 1004.723                                 | 1002.938 | 1000.961 | 998.782  |
| $x_w = 0.960$ | 0.00000                             | 998.064                                  | 996.187  | 994.128  | 991.899  |
|               | 0.02556                             | 998.782                                  | 996.879  | 994.795  | 992.540  |
|               | 0.05031                             | 999.470                                  | 997.540  | 995.433  | 993.152  |
|               | 0.07117                             | 1000.043                                 | 998.092  | 995.964  | 993.662  |

|               |         |          |          |          |         |
|---------------|---------|----------|----------|----------|---------|
|               | 0.12387 | 1001.470 | 999.464  | 997.284  | 994.928 |
|               | 0.17126 | 1002.724 | 1000.669 | 998.442  | 996.037 |
|               | 0.19723 | 1003.400 | 1001.318 | 999.064  | 996.635 |
|               | 0.23223 | 1004.298 | 1002.178 | 999.892  | 997.424 |
|               | 0.26541 | 1005.138 | 1002.981 | 1000.664 | 998.161 |
| $x_w = 0.940$ | 0.00000 | 998.615  | 996.399  | 994.011  | 991.478 |
|               | 0.02549 | 999.344  | 997.100  | 994.685  | 992.124 |
|               | 0.04819 | 999.984  | 997.716  | 995.277  | 992.693 |
|               | 0.07117 | 1000.624 | 998.331  | 995.870  | 993.262 |
|               | 0.12085 | 1001.981 | 999.637  | 997.127  | 994.469 |
|               | 0.17119 | 1003.319 | 1000.926 | 998.368  | 995.659 |
|               | 0.19426 | 1003.920 | 1001.503 | 998.925  | 996.194 |
|               | 0.23011 | 1004.837 | 1002.389 | 999.778  | 997.014 |
|               | 0.26290 | 1005.665 | 1003.188 | 1000.546 | 997.751 |
| $x_w = 0.920$ | 0.00000 | 999.220  | 996.662  | 993.975  | 991.159 |
|               | 0.02543 | 999.937  | 997.353  | 994.639  | 991.797 |
|               | 0.04882 | 1000.588 | 997.981  | 995.241  | 992.376 |
|               | 0.07199 | 1001.225 | 998.594  | 995.830  | 992.942 |
|               | 0.12158 | 1002.560 | 999.880  | 997.065  | 994.128 |
|               | 0.17003 | 1003.831 | 1001.101 | 998.237  | 995.252 |
|               | 0.19963 | 1004.587 | 1001.829 | 998.935  | 995.922 |
|               | 0.23678 | 1005.521 | 1002.724 | 999.793  | 996.747 |
|               | 0.26349 | 1006.180 | 1003.354 | 1000.403 | 997.328 |
| $x_w = 0.900$ | 0.00000 | 999.732  | 996.885  | 993.911  | 990.832 |
|               | 0.02802 | 1000.495 | 997.617  | 994.616  | 991.512 |
|               | 0.05067 | 1001.103 | 998.201  | 995.179  | 992.054 |
|               | 0.06925 | 1001.595 | 998.675  | 995.634  | 992.494 |
|               | 0.12312 | 1002.997 | 1000.021 | 996.930  | 993.742 |
|               | 0.16960 | 1004.170 | 1001.153 | 998.017  | 994.790 |
|               | 0.19731 | 1004.853 | 1001.813 | 998.650  | 995.399 |
|               | 0.23046 | 1005.657 | 1002.586 | 999.396  | 996.118 |
|               | 0.26704 | 1006.526 | 1003.429 | 1000.199 | 996.896 |
| $x_w = 0.800$ | 0.00000 | 999.831  | 995.952  | 992.012  | 988.006 |

|               |         |          |          |         |         |
|---------------|---------|----------|----------|---------|---------|
|               | 0.02662 | 1000.407 | 996.510  | 992.554 | 988.532 |
|               | 0.05278 | 1000.963 | 997.049  | 993.077 | 989.041 |
|               | 0.07110 | 1001.347 | 997.421  | 993.438 | 989.393 |
|               | 0.12147 | 1002.379 | 998.422  | 994.410 | 990.341 |
|               | 0.17142 | 1003.368 | 999.381  | 995.342 | 991.253 |
|               | 0.19612 | 1003.844 | 999.843  | 995.793 | 991.694 |
|               | 0.22873 | 1004.459 | 1000.440 | 996.375 | 992.263 |
|               | 0.26881 | 1005.197 | 1001.155 | 997.072 | 992.953 |
| <hr/>         |         |          |          |         |         |
| $x_w = 0.700$ | 0.00000 | 995.512  | 991.156  | 986.765 | 982.306 |
|               | 0.02926 | 996.023  | 991.658  | 987.258 | 982.790 |
|               | 0.05503 | 996.464  | 992.090  | 987.683 | 983.208 |
|               | 0.07243 | 996.756  | 992.378  | 987.965 | 983.485 |
|               | 0.12016 | 997.539  | 993.146  | 988.721 | 984.228 |
|               | 0.17029 | 998.328  | 993.921  | 989.484 | 984.977 |
|               | 0.19564 | 998.714  | 994.300  | 989.857 | 985.346 |
|               | 0.23316 | 999.270  | 994.846  | 990.395 | 985.877 |
|               | 0.26766 | 999.767  | 995.333  | 990.874 | 986.348 |
| <hr/>         |         |          |          |         |         |
| $x_w = 0.600$ | 0.00000 | 988.573  | 984.000  | 979.401 | 974.763 |
|               | 0.02648 | 988.985  | 984.406  | 979.803 | 975.159 |
|               | 0.04971 | 989.340  | 984.756  | 980.148 | 975.499 |
|               | 0.07105 | 989.659  | 985.071  | 980.460 | 975.807 |
|               | 0.12025 | 990.374  | 985.777  | 981.159 | 976.496 |
|               | 0.17040 | 991.074  | 986.465  | 981.840 | 977.170 |
|               | 0.19550 | 991.412  | 986.800  | 982.172 | 977.498 |
|               | 0.23012 | 991.866  | 987.250  | 982.617 | 977.939 |
|               | 0.26635 | 992.328  | 987.708  | 983.070 | 978.389 |
| <hr/>         |         |          |          |         |         |
| $x_w = 0.500$ | 0.00000 | 980.846  | 976.193  | 971.509 | 966.803 |
|               | 0.02201 | 981.178  | 976.521  | 971.833 | 967.124 |
|               | 0.05108 | 981.608  | 976.946  | 972.254 | 967.540 |
|               | 0.07481 | 981.954  | 977.286  | 972.592 | 967.873 |
|               | 0.12232 | 982.627  | 977.953  | 973.251 | 968.525 |
|               | 0.17008 | 983.280  | 978.600  | 973.889 | 969.159 |
|               | 0.19646 | 983.631  | 978.947  | 974.232 | 969.499 |

|               |         |         |         |         |         |
|---------------|---------|---------|---------|---------|---------|
|               | 0.23312 | 984.105 | 979.417 | 974.699 | 969.963 |
|               | 0.27166 | 984.592 | 979.899 | 975.179 | 970.438 |
| $x_w = 0.400$ | 0.00000 | 973.014 | 968.325 | 963.609 | 958.847 |
|               | 0.02618 | 973.424 | 968.729 | 964.009 | 959.244 |
|               | 0.05053 | 973.798 | 969.099 | 964.374 | 959.608 |
|               | 0.07297 | 974.137 | 969.434 | 964.706 | 959.937 |
|               | 0.12102 | 974.845 | 970.135 | 965.400 | 960.625 |
|               | 0.17060 | 975.549 | 970.834 | 966.093 | 961.309 |
|               | 0.19577 | 975.897 | 971.179 | 966.435 | 961.647 |
|               | 0.23433 | 976.416 | 971.696 | 966.944 | 962.154 |
|               | 0.27634 | 976.967 | 972.244 | 967.489 | 962.691 |
| $x_w = 0.300$ | 0.00000 | 965.715 | 960.997 | 956.255 | 951.499 |
|               | 0.02246 | 966.100 | 961.380 | 956.635 | 951.876 |
|               | 0.05194 | 966.597 | 961.874 | 957.125 | 952.362 |
|               | 0.07419 | 966.966 | 962.241 | 957.489 | 952.723 |
|               | 0.12146 | 967.731 | 963.001 | 958.244 | 953.474 |
|               | 0.16973 | 968.488 | 963.752 | 958.991 | 954.217 |
|               | 0.19491 | 968.871 | 964.133 | 959.370 | 954.595 |
|               | 0.23015 | 969.397 | 964.656 | 959.890 | 955.113 |
|               | 0.27596 | 970.063 | 965.318 | 960.551 | 955.769 |
| $x_w = 0.200$ | 0.00000 | 959.317 | 954.581 | 949.829 | 945.053 |
|               | 0.02621 | 959.845 | 955.104 | 950.348 | 945.570 |
|               | 0.04975 | 960.310 | 955.566 | 950.807 | 946.027 |
|               | 0.07225 | 960.749 | 956.001 | 951.239 | 946.458 |
|               | 0.12419 | 961.733 | 956.980 | 952.212 | 947.428 |
|               | 0.16946 | 962.562 | 957.803 | 953.034 | 948.244 |
|               | 0.19216 | 962.965 | 958.206 | 953.438 | 948.648 |
|               | 0.23052 | 963.634 | 958.873 | 954.103 | 949.313 |
|               | 0.27650 | 964.417 | 959.651 | 954.883 | 950.086 |
| $x_w = 0.100$ | 0.00000 | 953.743 | 948.988 | 944.227 | 939.448 |
|               | 0.02383 | 954.311 | 949.552 | 944.788 | 940.006 |
|               | 0.05002 | 954.921 | 950.159 | 945.392 | 940.606 |
|               | 0.07364 | 955.461 | 950.694 | 945.924 | 941.136 |

|               |         |         |         |         |         |
|---------------|---------|---------|---------|---------|---------|
|               | 0.12204 | 956.528 | 951.755 | 946.979 | 942.187 |
|               | 0.17099 | 957.557 | 952.779 | 948.000 | 943.201 |
|               | 0.19562 | 958.056 | 953.275 | 948.493 | 943.692 |
|               | 0.23233 | 958.776 | 953.993 | 949.210 | 944.407 |
|               | 0.27585 | 959.603 | 954.806 | 950.025 | 945.227 |
| $x_w = 0.000$ | 0.00000 | 948.744 | 943.979 | 939.207 | 934.428 |
|               | 0.02386 | 949.390 | 944.623 | 939.849 | 935.071 |
|               | 0.05145 | 950.114 | 945.343 | 940.568 | 935.791 |
|               | 0.07363 | 950.677 | 945.905 | 941.129 | 936.353 |
|               | 0.12070 | 951.816 | 947.043 | 942.268 | 937.491 |
|               | 0.17089 | 952.946 | 948.176 | 943.404 | 938.627 |
|               | 0.19481 | 953.456 | 948.689 | 943.917 | 939.139 |
|               | 0.23328 | 954.236 | 949.470 | 944.706 | 939.928 |
|               | 0.27780 | 955.072 | 950.317 | 945.558 | 940.776 |

The uncertainty of the mole fraction  $x_w$  is equal to  $\pm 1 \cdot 10^{-3}$ . The uncertainty of molality is equal to  $\pm 1.5 \cdot 10^{-5} \text{ mol} \cdot \text{kg}^{-1}$ .

**Table S2.** Density of the hexaglyme + DMF + W solution at pressure  $p = 0.100 \pm 0.005 \text{ MPa}$ .

| $\rho / (\text{kg} \cdot \text{m}^{-3})$ |                                       |          |          |          |          |
|------------------------------------------|---------------------------------------|----------|----------|----------|----------|
|                                          | $m / \text{mol} \cdot \text{kg}^{-1}$ | 293.15 K | 298.15 K | 303.15 K | 308.15 K |
| $x_w = 1.000$                            | 0.00000                               | 998.208  | 997.055  | 995.653  | 994.043  |
|                                          | 0.02654                               | 999.043  | 997.859  | 996.428  | 994.790  |
|                                          | 0.04718                               | 999.690  | 998.483  | 997.027  | 995.367  |
|                                          | 0.07348                               | 1000.508 | 999.273  | 997.782  | 996.096  |
|                                          | 0.12072                               | 1001.966 | 1000.676 | 999.131  | 997.394  |
|                                          | 0.16577                               | 1003.341 | 1001.995 | 1000.403 | 998.614  |
|                                          | 0.19290                               | 1004.162 | 1002.781 | 1001.155 | 999.342  |
|                                          | 0.23377                               | 1005.389 | 1003.960 | 1002.284 | 1000.426 |
|                                          | 0.26703                               | 1006.382 | 1004.911 | 1003.194 | 1001.298 |
| $x_w = 0.980$                            | 0.00000                               | 997.775  | 996.263  | 994.558  | 992.646  |
|                                          | 0.02630                               | 998.677  | 997.134  | 995.400  | 993.461  |
|                                          | 0.04688                               | 999.377  | 997.809  | 996.053  | 994.091  |
|                                          | 0.07142                               | 1000.204 | 998.606  | 996.824  | 994.836  |

|               |         |          |          |          |          |
|---------------|---------|----------|----------|----------|----------|
|               | 0.11931 | 1001.796 | 1000.138 | 998.304  | 996.266  |
|               | 0.17341 | 1003.557 | 1001.833 | 999.939  | 997.845  |
|               | 0.19399 | 1004.218 | 1002.468 | 1000.548 | 998.436  |
|               | 0.22823 | 1005.303 | 1003.515 | 1001.562 | 999.408  |
|               | 0.26482 | 1006.445 | 1004.618 | 1002.625 | 1000.427 |
| $x_w = 0.960$ | 0.00000 | 998.068  | 996.182  | 994.125  | 991.897  |
|               | 0.02806 | 999.058  | 997.136  | 995.044  | 992.786  |
|               | 0.04993 | 999.821  | 997.871  | 995.752  | 993.470  |
|               | 0.06868 | 1000.468 | 998.495  | 996.353  | 994.050  |
|               | 0.11870 | 1002.166 | 1000.131 | 997.928  | 995.573  |
|               | 0.16749 | 1003.782 | 1001.687 | 999.430  | 997.025  |
|               | 0.19471 | 1004.665 | 1002.542 | 1000.251 | 997.819  |
|               | 0.23961 | 1006.108 | 1003.926 | 1001.583 | 999.103  |
|               | 0.26936 | 1007.045 | 1004.828 | 1002.452 | 999.943  |
| $x_w = 0.940$ | 0.00000 | 998.618  | 996.396  | 994.007  | 991.473  |
|               | 0.02764 | 999.613  | 997.356  | 994.932  | 992.366  |
|               | 0.04917 | 1000.378 | 998.094  | 995.642  | 993.051  |
|               | 0.06764 | 1001.025 | 998.718  | 996.243  | 993.632  |
|               | 0.11687 | 1002.721 | 1000.352 | 997.817  | 995.153  |
|               | 0.16487 | 1004.328 | 1001.902 | 999.307  | 996.595  |
|               | 0.19164 | 1005.205 | 1002.747 | 1000.121 | 997.383  |
|               | 0.23578 | 1006.619 | 1004.112 | 1001.436 | 998.654  |
|               | 0.26501 | 1007.537 | 1005.001 | 1002.287 | 999.478  |
| $x_w = 0.920$ | 0.00000 | 999.226  | 996.669  | 993.978  | 991.155  |
|               | 0.02492 | 1000.108 | 997.519  | 994.800  | 991.950  |
|               | 0.04866 | 1000.936 | 998.317  | 995.572  | 992.696  |
|               | 0.07143 | 1001.718 | 999.071  | 996.302  | 993.401  |
|               | 0.11787 | 1003.281 | 1000.578 | 997.759  | 994.811  |
|               | 0.17385 | 1005.104 | 1002.341 | 999.461  | 996.458  |
|               | 0.20086 | 1005.962 | 1003.168 | 1000.262 | 997.232  |
|               | 0.22911 | 1006.840 | 1004.017 | 1001.085 | 998.028  |
|               | 0.25937 | 1007.769 | 1004.910 | 1001.951 | 998.867  |
| $x_w = 0.900$ | 0.00000 | 999.738  | 996.889  | 993.918  | 990.836  |

|               |         |          |          |          |         |
|---------------|---------|----------|----------|----------|---------|
|               | 0.02702 | 1000.673 | 997.794  | 994.794  | 991.685 |
|               | 0.04911 | 1001.426 | 998.523  | 995.499  | 992.369 |
|               | 0.06985 | 1002.125 | 999.198  | 996.152  | 993.003 |
|               | 0.11608 | 1003.651 | 1000.673 | 997.580  | 994.386 |
|               | 0.16915 | 1005.350 | 1002.316 | 999.169  | 995.928 |
|               | 0.19264 | 1006.084 | 1003.027 | 999.856  | 996.594 |
|               | 0.23327 | 1007.326 | 1004.229 | 1001.021 | 997.724 |
|               | 0.26404 | 1008.247 | 1005.124 | 1001.884 | 998.563 |
| <hr/>         |         |          |          |          |         |
| $x_w = 0.800$ | 0.00000 | 999.839  | 995.958  | 992.017  | 988.009 |
|               | 0.02631 | 1000.594 | 996.697  | 992.741  | 988.714 |
|               | 0.05015 | 1001.259 | 997.350  | 993.380  | 989.340 |
|               | 0.06965 | 1001.798 | 997.879  | 993.899  | 989.844 |
|               | 0.12002 | 1003.158 | 999.212  | 995.205  | 991.114 |
|               | 0.16883 | 1004.429 | 1000.458 | 996.428  | 992.302 |
|               | 0.19503 | 1005.095 | 1001.108 | 997.067  | 992.924 |
|               | 0.23372 | 1006.052 | 1002.046 | 997.986  | 993.818 |
|               | 0.26945 | 1006.911 | 1002.889 | 998.812  | 994.618 |
| <hr/>         |         |          |          |          |         |
| $x_w = 0.700$ | 0.00000 | 995.509  | 991.159  | 986.768  | 982.307 |
|               | 0.02721 | 996.154  | 991.794  | 987.392  | 982.922 |
|               | 0.05019 | 996.690  | 992.320  | 987.909  | 983.432 |
|               | 0.07042 | 997.154  | 992.776  | 988.358  | 983.874 |
|               | 0.11807 | 998.221  | 993.826  | 989.391  | 984.891 |
|               | 0.16552 | 999.247  | 994.836  | 990.386  | 985.870 |
|               | 0.19639 | 999.894  | 995.475  | 991.015  | 986.488 |
|               | 0.23262 | 1000.635 | 996.206  | 991.734  | 987.199 |
|               | 0.26930 | 1001.371 | 996.930  | 992.449  | 987.900 |
| <hr/>         |         |          |          |          |         |
| $x_w = 0.600$ | 0.00000 | 988.569  | 984.007  | 979.409  | 974.779 |
|               | 0.02582 | 989.123  | 984.556  | 979.953  | 975.318 |
|               | 0.04807 | 989.593  | 985.021  | 980.413  | 975.773 |
|               | 0.07046 | 990.058  | 985.481  | 980.869  | 976.225 |
|               | 0.11933 | 991.047  | 986.461  | 981.840  | 977.186 |
|               | 0.16988 | 992.033  | 987.438  | 982.807  | 978.146 |
|               | 0.19224 | 992.456  | 987.859  | 983.224  | 978.559 |

|               |         |         |         |         |         |
|---------------|---------|---------|---------|---------|---------|
|               | 0.23002 | 993.158 | 988.552 | 983.912 | 979.243 |
|               | 0.27268 | 993.927 | 989.317 | 984.669 | 979.993 |
| $x_w = 0.500$ | 0.00000 | 980.844 | 976.191 | 971.506 | 966.804 |
|               | 0.02620 | 981.386 | 976.729 | 972.039 | 967.332 |
|               | 0.04908 | 981.851 | 977.190 | 972.496 | 967.786 |
|               | 0.07135 | 982.297 | 977.632 | 972.935 | 968.221 |
|               | 0.11924 | 983.233 | 978.560 | 973.855 | 969.133 |
|               | 0.16660 | 984.127 | 979.447 | 974.735 | 970.006 |
|               | 0.19558 | 984.659 | 979.975 | 975.257 | 970.525 |
|               | 0.23001 | 985.276 | 980.589 | 975.866 | 971.129 |
|               | 0.27069 | 985.986 | 981.296 | 976.570 | 971.824 |
| $x_w = 0.400$ | 0.00000 | 973.003 | 968.312 | 963.596 | 958.835 |
|               | 0.02533 | 973.554 | 968.857 | 964.139 | 959.374 |
|               | 0.04807 | 974.040 | 969.339 | 964.618 | 959.849 |
|               | 0.07303 | 974.566 | 969.860 | 965.136 | 960.363 |
|               | 0.12068 | 975.546 | 970.832 | 966.103 | 961.322 |
|               | 0.16770 | 976.481 | 971.762 | 967.025 | 962.238 |
|               | 0.19931 | 977.093 | 972.369 | 967.628 | 962.837 |
|               | 0.23383 | 977.749 | 973.021 | 968.274 | 963.478 |
|               | 0.27474 | 978.506 | 973.775 | 969.020 | 964.222 |
| $x_w = 0.300$ | 0.00000 | 965.713 | 960.995 | 956.254 | 951.497 |
|               | 0.02667 | 966.351 | 961.629 | 956.883 | 952.122 |
|               | 0.05097 | 966.923 | 962.197 | 957.446 | 952.682 |
|               | 0.07071 | 967.380 | 962.651 | 957.897 | 953.129 |
|               | 0.11946 | 968.482 | 963.746 | 958.985 | 954.211 |
|               | 0.16816 | 969.548 | 964.803 | 960.036 | 955.257 |
|               | 0.19414 | 970.099 | 965.352 | 960.583 | 955.800 |
|               | 0.23318 | 970.910 | 966.157 | 961.385 | 956.598 |
|               | 0.27451 | 971.747 | 966.991 | 962.212 | 957.422 |
| $x_w = 0.200$ | 0.00000 | 959.319 | 954.584 | 949.833 | 945.054 |
|               | 0.02406 | 959.984 | 955.245 | 950.489 | 945.706 |
|               | 0.05074 | 960.707 | 955.965 | 951.205 | 946.416 |
|               | 0.06912 | 961.198 | 956.453 | 951.690 | 946.899 |

|               |         |         |         |         |         |
|---------------|---------|---------|---------|---------|---------|
|               | 0.12024 | 962.529 | 957.779 | 953.011 | 948.210 |
|               | 0.17291 | 963.850 | 959.092 | 954.323 | 949.514 |
|               | 0.19690 | 964.434 | 959.675 | 954.905 | 950.093 |
|               | 0.23388 | 965.315 | 960.553 | 955.780 | 950.965 |
|               | 0.26538 | 966.050 | 961.286 | 956.510 | 951.695 |
| $x_w = 0.100$ | 0.00000 | 953.742 | 948.985 | 944.229 | 939.449 |
|               | 0.02556 | 954.544 | 949.784 | 945.021 | 940.238 |
|               | 0.04951 | 955.278 | 950.514 | 945.747 | 940.961 |
|               | 0.07371 | 956.004 | 951.235 | 946.465 | 941.675 |
|               | 0.12028 | 957.354 | 952.574 | 947.798 | 943.005 |
|               | 0.16628 | 958.626 | 953.833 | 949.055 | 944.259 |
|               | 0.19362 | 959.354 | 954.553 | 949.774 | 944.977 |
|               | 0.23091 | 960.312 | 955.498 | 950.721 | 945.924 |
|               | 0.28006 | 961.514 | 956.682 | 951.909 | 947.112 |
| $x_w = 0.000$ | 0.00000 | 948.746 | 943.976 | 939.205 | 934.427 |
|               | 0.02672 | 949.687 | 944.913 | 940.138 | 935.358 |
|               | 0.04932 | 950.458 | 945.682 | 940.904 | 936.122 |
|               | 0.07293 | 951.238 | 946.462 | 941.679 | 936.898 |
|               | 0.12086 | 952.743 | 947.970 | 943.176 | 938.401 |
|               | 0.17102 | 954.206 | 949.440 | 944.633 | 939.871 |
|               | 0.19284 | 954.808 | 950.046 | 945.232 | 940.478 |
|               | 0.23187 | 955.827 | 951.078 | 946.250 | 941.514 |
|               | 0.28013 | 956.991 | 952.261 | 947.415 | 942.707 |

The uncertainty of the mole fraction  $x_w$  is equal to  $\pm 1 \cdot 10^{-3}$ . The uncertainty of molality is equal to  $\pm 1.5 \cdot 10^{-5} \text{ mol} \cdot \text{kg}^{-1}$ .

**Table S3.** Speed of sound in the pentaglyme + DMF + W solution at pressure  $p = 0.100 \pm 0.005 \text{ MPa}$ .

| $u / (\text{m} \cdot \text{s}^{-1})$ |                                         |          |          |          |          |
|--------------------------------------|-----------------------------------------|----------|----------|----------|----------|
|                                      | $m / (\text{mol} \cdot \text{kg}^{-1})$ | 293.15 K | 298.15 K | 303.15 K | 308.15 K |
| $x_w = 1.000$                        | 0.00000                                 | 1483.1   | 1497.3   | 1509.7   | 1520.3   |
|                                      | 0.02720                                 | 1487.6   | 1501.4   | 1513.4   | 1523.7   |
|                                      | 0.04899                                 | 1491.2   | 1504.7   | 1516.4   | 1526.4   |

|               |         |        |        |        |        |
|---------------|---------|--------|--------|--------|--------|
|               | 0.07406 | 1495.4 | 1508.4 | 1519.8 | 1529.5 |
|               | 0.12010 | 1503.1 | 1515.3 | 1526.0 | 1535.2 |
|               | 0.17162 | 1511.7 | 1523.0 | 1533.0 | 1541.6 |
|               | 0.19593 | 1515.8 | 1526.7 | 1536.2 | 1544.7 |
|               | 0.23202 | 1521.8 | 1532.1 | 1541.1 | 1549.2 |
|               | 0.26652 | 1527.5 | 1537.2 | 1545.8 | 1553.5 |
| $x_W = 0.980$ | 0.00000 | 1534.3 | 1543.2 | 1550.6 | 1556.5 |
|               | 0.02290 | 1537.7 | 1546.3 | 1553.3 | 1559.0 |
|               | 0.05007 | 1541.6 | 1549.9 | 1556.6 | 1561.9 |
|               | 0.07274 | 1545.0 | 1552.9 | 1559.3 | 1564.3 |
|               | 0.12350 | 1552.4 | 1559.8 | 1565.5 | 1569.8 |
|               | 0.17066 | 1559.3 | 1566.1 | 1571.2 | 1574.9 |
|               | 0.19792 | 1563.3 | 1569.7 | 1574.4 | 1577.8 |
|               | 0.22953 | 1568.0 | 1574.0 | 1578.2 | 1581.2 |
|               | 0.26544 | 1573.2 | 1578.8 | 1582.6 | 1585.1 |
| $x_W = 0.960$ | 0.00000 | 1575.1 | 1579.5 | 1582.6 | 1584.7 |
|               | 0.02556 | 1578.7 | 1582.7 | 1585.6 | 1587.3 |
|               | 0.05031 | 1582.2 | 1585.8 | 1588.4 | 1589.8 |
|               | 0.07117 | 1585.0 | 1588.4 | 1590.7 | 1591.9 |
|               | 0.12387 | 1592.0 | 1594.7 | 1596.4 | 1596.9 |
|               | 0.17126 | 1598.1 | 1600.2 | 1601.4 | 1601.3 |
|               | 0.19723 | 1601.3 | 1603.1 | 1604.0 | 1603.6 |
|               | 0.23223 | 1605.5 | 1607.0 | 1607.4 | 1606.7 |
|               | 0.26541 | 1609.5 | 1610.5 | 1610.6 | 1609.5 |
| $x_W = 0.940$ | 0.00000 | 1610.0 | 1610.0 | 1609.4 | 1608.0 |
|               | 0.02549 | 1613.1 | 1612.9 | 1611.9 | 1610.1 |
|               | 0.04819 | 1615.8 | 1615.4 | 1614.0 | 1612.0 |
|               | 0.07117 | 1618.5 | 1617.9 | 1616.2 | 1613.9 |
|               | 0.12085 | 1624.1 | 1623.2 | 1620.7 | 1617.9 |
|               | 0.17119 | 1629.6 | 1628.3 | 1625.1 | 1621.7 |
|               | 0.19426 | 1632.1 | 1630.6 | 1627.0 | 1623.5 |
|               | 0.23011 | 1635.8 | 1634.0 | 1629.9 | 1626.0 |
|               | 0.26290 | 1639.1 | 1637.1 | 1632.5 | 1628.3 |

|               |         |        |        |        |        |
|---------------|---------|--------|--------|--------|--------|
| $x_W = 0.920$ | 0.00000 | 1635.4 | 1632.5 | 1628.9 | 1624.7 |
|               | 0.02543 | 1638.0 | 1634.8 | 1630.9 | 1626.5 |
|               | 0.04882 | 1640.3 | 1636.9 | 1632.7 | 1628.1 |
|               | 0.07199 | 1642.5 | 1638.9 | 1634.4 | 1629.7 |
|               | 0.12158 | 1647.0 | 1642.9 | 1637.9 | 1632.8 |
|               | 0.17003 | 1651.1 | 1646.5 | 1641.0 | 1635.6 |
|               | 0.19963 | 1653.5 | 1648.6 | 1642.7 | 1637.1 |
|               | 0.23678 | 1656.2 | 1651.0 | 1644.8 | 1639.0 |
|               | 0.26349 | 1658.1 | 1652.7 | 1646.2 | 1640.2 |
| $x_W = 0.900$ | 0.00000 | 1656.9 | 1651.2 | 1644.9 | 1638.2 |
|               | 0.02802 | 1659.2 | 1653.2 | 1646.7 | 1639.7 |
|               | 0.05067 | 1661.0 | 1654.8 | 1648.1 | 1640.9 |
|               | 0.06925 | 1662.5 | 1656.1 | 1649.2 | 1641.9 |
|               | 0.12312 | 1666.7 | 1659.8 | 1652.4 | 1644.6 |
|               | 0.16960 | 1670.1 | 1662.8 | 1655.0 | 1646.9 |
|               | 0.19731 | 1672.1 | 1664.5 | 1656.5 | 1648.2 |
|               | 0.23046 | 1674.4 | 1666.6 | 1658.3 | 1649.7 |
|               | 0.26704 | 1676.9 | 1668.7 | 1660.2 | 1651.3 |
| $x_W = 0.800$ | 0.00000 | 1701.0 | 1688.0 | 1674.6 | 1661.0 |
|               | 0.02662 | 1701.4 | 1688.3 | 1674.8 | 1661.0 |
|               | 0.05278 | 1701.7 | 1688.5 | 1674.9 | 1661.0 |
|               | 0.07110 | 1701.9 | 1688.6 | 1675.0 | 1661.0 |
|               | 0.12147 | 1702.5 | 1688.9 | 1675.1 | 1661.0 |
|               | 0.17142 | 1702.8 | 1689.1 | 1675.0 | 1660.8 |
|               | 0.19612 | 1703.0 | 1689.1 | 1675.0 | 1660.6 |
|               | 0.22873 | 1703.1 | 1689.1 | 1674.9 | 1660.4 |
|               | 0.26881 | 1703.2 | 1689.1 | 1674.7 | 1660.1 |
| $x_W = 0.700$ | 0.00000 | 1689.2 | 1672.0 | 1654.8 | 1637.6 |
|               | 0.02926 | 1688.6 | 1671.3 | 1654.1 | 1636.8 |
|               | 0.05503 | 1687.9 | 1670.7 | 1653.4 | 1636.1 |
|               | 0.07243 | 1687.5 | 1670.2 | 1652.8 | 1635.6 |
|               | 0.12016 | 1686.4 | 1668.9 | 1651.5 | 1634.1 |
|               | 0.17029 | 1685.1 | 1667.6 | 1650.1 | 1632.5 |

|               |         |        |        |        |        |
|---------------|---------|--------|--------|--------|--------|
|               | 0.19564 | 1684.4 | 1666.8 | 1649.3 | 1631.7 |
|               | 0.23316 | 1683.4 | 1665.7 | 1648.1 | 1630.4 |
|               | 0.26766 | 1682.4 | 1664.7 | 1647.0 | 1629.3 |
| $x_W = 0.600$ | 0.00000 | 1655.4 | 1638.6 | 1621.3 | 1603.3 |
|               | 0.02648 | 1654.5 | 1637.7 | 1620.3 | 1602.2 |
|               | 0.04971 | 1653.7 | 1636.8 | 1619.3 | 1601.4 |
|               | 0.07105 | 1652.8 | 1635.9 | 1618.5 | 1600.5 |
|               | 0.12025 | 1650.9 | 1634.0 | 1616.6 | 1598.5 |
|               | 0.17040 | 1649.0 | 1632.1 | 1614.6 | 1596.5 |
|               | 0.19550 | 1648.0 | 1631.0 | 1613.5 | 1595.4 |
|               | 0.23012 | 1646.5 | 1629.5 | 1612.1 | 1594.0 |
|               | 0.26635 | 1645.0 | 1628.0 | 1610.5 | 1592.5 |
| $x_W = 0.500$ | 0.00000 | 1618.4 | 1599.7 | 1581.0 | 1562.3 |
|               | 0.02201 | 1617.7 | 1599.0 | 1580.2 | 1561.5 |
|               | 0.05108 | 1616.6 | 1597.9 | 1579.1 | 1560.4 |
|               | 0.07481 | 1615.8 | 1597.1 | 1578.3 | 1559.7 |
|               | 0.12232 | 1614.1 | 1595.4 | 1576.6 | 1558.0 |
|               | 0.17008 | 1612.4 | 1593.6 | 1574.8 | 1556.3 |
|               | 0.19646 | 1611.4 | 1592.5 | 1573.9 | 1555.2 |
|               | 0.23312 | 1610.0 | 1591.2 | 1572.5 | 1553.9 |
|               | 0.27166 | 1608.5 | 1589.7 | 1571.0 | 1552.5 |
| $x_W = 0.400$ | 0.00000 | 1581.7 | 1563.8 | 1545.7 | 1527.0 |
|               | 0.02618 | 1581.0 | 1563.2 | 1544.9 | 1526.3 |
|               | 0.05053 | 1580.3 | 1562.4 | 1544.3 | 1525.6 |
|               | 0.07297 | 1579.6 | 1561.8 | 1543.6 | 1525.0 |
|               | 0.12102 | 1578.2 | 1560.3 | 1542.1 | 1523.5 |
|               | 0.17060 | 1576.7 | 1558.8 | 1540.7 | 1522.0 |
|               | 0.19577 | 1576.0 | 1558.1 | 1539.9 | 1521.2 |
|               | 0.23433 | 1574.7 | 1556.8 | 1538.7 | 1520.0 |
|               | 0.27634 | 1573.4 | 1555.5 | 1537.3 | 1518.7 |
| $x_W = 0.300$ | 0.00000 | 1549.7 | 1530.6 | 1511.6 | 1492.8 |
|               | 0.02246 | 1549.3 | 1530.2 | 1511.2 | 1492.2 |
|               | 0.05194 | 1548.5 | 1529.5 | 1510.4 | 1491.6 |

|               |         |        |        |        |        |
|---------------|---------|--------|--------|--------|--------|
|               | 0.07419 | 1548.1 | 1528.9 | 1509.9 | 1491.0 |
|               | 0.12146 | 1546.9 | 1527.8 | 1508.7 | 1489.9 |
|               | 0.16973 | 1545.7 | 1526.5 | 1507.5 | 1488.6 |
|               | 0.19491 | 1545.1 | 1525.9 | 1506.8 | 1487.9 |
|               | 0.23015 | 1544.1 | 1525.0 | 1505.9 | 1486.9 |
|               | 0.27596 | 1542.9 | 1523.7 | 1504.6 | 1485.7 |
| <hr/>         |         |        |        |        |        |
| $x_W = 0.200$ | 0.00000 | 1522.4 | 1503.8 | 1484.9 | 1465.9 |
|               | 0.02621 | 1522.0 | 1503.4 | 1484.5 | 1465.5 |
|               | 0.04975 | 1521.7 | 1503.1 | 1484.2 | 1465.2 |
|               | 0.07225 | 1521.3 | 1502.6 | 1483.8 | 1464.7 |
|               | 0.12419 | 1520.4 | 1501.7 | 1482.9 | 1463.8 |
|               | 0.16946 | 1519.5 | 1500.9 | 1482.0 | 1463.0 |
|               | 0.19216 | 1519.1 | 1500.5 | 1481.6 | 1462.5 |
|               | 0.23052 | 1518.3 | 1499.7 | 1480.8 | 1461.8 |
|               | 0.27650 | 1517.4 | 1498.7 | 1479.8 | 1460.8 |
| <hr/>         |         |        |        |        |        |
| $x_W = 0.100$ | 0.00000 | 1497.6 | 1478.2 | 1458.9 | 1439.9 |
|               | 0.02383 | 1497.4 | 1478.0 | 1458.7 | 1439.7 |
|               | 0.05002 | 1497.2 | 1477.9 | 1458.6 | 1439.5 |
|               | 0.07364 | 1497.1 | 1477.6 | 1458.5 | 1439.3 |
|               | 0.12204 | 1496.6 | 1477.1 | 1457.8 | 1438.8 |
|               | 0.17099 | 1496.0 | 1476.6 | 1457.3 | 1438.2 |
|               | 0.19562 | 1495.7 | 1476.3 | 1457.0 | 1437.9 |
|               | 0.23233 | 1495.2 | 1475.8 | 1456.5 | 1437.4 |
|               | 0.27585 | 1494.5 | 1475.2 | 1455.8 | 1436.8 |
| <hr/>         |         |        |        |        |        |
| $x_W = 0.000$ | 0.00000 | 1477.2 | 1457.9 | 1438.6 | 1419.1 |
|               | 0.02386 | 1477.2 | 1458.0 | 1438.6 | 1419.1 |
|               | 0.05145 | 1477.2 | 1458.0 | 1438.6 | 1419.1 |
|               | 0.07363 | 1477.2 | 1457.9 | 1438.6 | 1419.1 |
|               | 0.12070 | 1477.1 | 1457.8 | 1438.4 | 1418.9 |
|               | 0.17089 | 1476.8 | 1457.6 | 1438.2 | 1418.7 |
|               | 0.19481 | 1476.7 | 1457.4 | 1438.1 | 1418.5 |
|               | 0.23328 | 1476.4 | 1457.2 | 1437.8 | 1418.3 |
|               | 0.27780 | 1476.0 | 1456.8 | 1437.4 | 1417.9 |

The uncertainty of the mole fraction  $x_W$  is equal to  $\pm 1 \cdot 10^{-3}$ . The uncertainty of molality is equal to  $\pm 1.5 \cdot 10^{-5} \text{ mol} \cdot \text{kg}^{-1}$ .

**Table S4.** Speed of sound in the hexaglyme + DMF + W solution at pressure  $p = 0.100 \pm 0.005 \text{ MPa}$ .

|                        |                                         | $u / (\text{m} \cdot \text{s}^{-1})$ |          |          |          |
|------------------------|-----------------------------------------|--------------------------------------|----------|----------|----------|
|                        | $m / (\text{mol} \cdot \text{kg}^{-1})$ | 293.15 K                             | 298.15 K | 303.15 K | 308.15 K |
| $x_{\text{W}} = 1.000$ | 0.00000                                 | 1483.5                               | 1496.8   | 1510.2   | 1520.7   |
|                        | 0.02654                                 | 1488.6                               | 1501.5   | 1514.4   | 1524.5   |
|                        | 0.04718                                 | 1492.6                               | 1505.1   | 1517.7   | 1527.5   |
|                        | 0.07348                                 | 1497.7                               | 1509.7   | 1521.9   | 1531.3   |
|                        | 0.12072                                 | 1506.8                               | 1518.0   | 1529.5   | 1538.1   |
|                        | 0.16577                                 | 1515.5                               | 1525.9   | 1536.6   | 1544.7   |
|                        | 0.19290                                 | 1520.7                               | 1530.7   | 1541.0   | 1548.6   |
|                        | 0.23377                                 | 1528.6                               | 1537.9   | 1547.5   | 1554.5   |
|                        | 0.26703                                 | 1535.0                               | 1543.7   | 1552.8   | 1559.3   |
| $x_{\text{W}} = 0.980$ | 0.00000                                 | 1535.1                               | 1543.9   | 1551.7   | 1557.4   |
|                        | 0.02630                                 | 1539.6                               | 1548.0   | 1555.3   | 1560.7   |
|                        | 0.04688                                 | 1543.1                               | 1551.2   | 1558.2   | 1563.2   |
|                        | 0.07142                                 | 1547.2                               | 1555.0   | 1561.6   | 1566.3   |
|                        | 0.11931                                 | 1555.4                               | 1562.4   | 1568.2   | 1572.2   |
|                        | 0.17341                                 | 1564.6                               | 1570.8   | 1575.7   | 1579.0   |
|                        | 0.19399                                 | 1568.1                               | 1574.0   | 1578.6   | 1581.5   |
|                        | 0.22823                                 | 1574.0                               | 1579.3   | 1583.3   | 1585.8   |
|                        | 0.26482                                 | 1580.2                               | 1585.0   | 1588.4   | 1590.4   |
| $x_{\text{W}} = 0.960$ | 0.00000                                 | 1574.7                               | 1579.0   | 1582.1   | 1584.1   |
|                        | 0.02806                                 | 1579.3                               | 1583.1   | 1585.8   | 1587.4   |
|                        | 0.04993                                 | 1582.8                               | 1586.2   | 1588.7   | 1590.0   |
|                        | 0.06868                                 | 1585.8                               | 1588.9   | 1591.1   | 1592.2   |
|                        | 0.11870                                 | 1593.6                               | 1595.8   | 1597.5   | 1597.8   |
|                        | 0.16749                                 | 1600.9                               | 1602.3   | 1603.4   | 1603.2   |
|                        | 0.19471                                 | 1604.9                               | 1605.9   | 1606.7   | 1606.1   |
|                        | 0.23961                                 | 1611.3                               | 1611.6   | 1611.9   | 1610.8   |

|               |         |        |        |        |        |
|---------------|---------|--------|--------|--------|--------|
|               | 0.26936 | 1615.5 | 1615.3 | 1615.3 | 1613.8 |
| $x_w = 0.940$ | 0.00000 | 1607.7 | 1608.1 | 1607.6 | 1606.2 |
|               | 0.04917 | 1611.6 | 1611.7 | 1610.8 | 1609.0 |
|               | 0.06764 | 1614.6 | 1614.3 | 1613.2 | 1611.1 |
|               | 0.11687 | 1617.0 | 1616.6 | 1615.2 | 1612.8 |
|               | 0.16487 | 1623.1 | 1622.1 | 1620.2 | 1617.2 |
|               | 0.19164 | 1628.5 | 1627.0 | 1624.6 | 1621.0 |
|               | 0.23578 | 1631.3 | 1629.5 | 1626.9 | 1622.9 |
|               | 0.26501 | 1635.4 | 1633.3 | 1630.3 | 1625.9 |
|               | 0.04917 | 1637.9 | 1635.6 | 1632.4 | 1627.7 |
| $x_w = 0.920$ | 0.00000 | 1635.0 | 1632.1 | 1628.5 | 1624.3 |
|               | 0.02492 | 1638.0 | 1634.7 | 1630.8 | 1626.3 |
|               | 0.04866 | 1640.7 | 1637.2 | 1633.0 | 1628.2 |
|               | 0.07143 | 1643.3 | 1639.5 | 1635.0 | 1629.9 |
|               | 0.11787 | 1648.4 | 1644.0 | 1639.0 | 1633.4 |
|               | 0.17385 | 1654.2 | 1649.2 | 1643.6 | 1637.4 |
|               | 0.20086 | 1656.9 | 1651.6 | 1645.7 | 1639.2 |
|               | 0.22911 | 1659.6 | 1654.0 | 1647.8 | 1641.1 |
|               | 0.25937 | 1662.5 | 1656.5 | 1650.0 | 1643.0 |
| $x_w = 0.900$ | 0.00000 | 1655.5 | 1649.8 | 1643.6 | 1636.9 |
|               | 0.02702 | 1658.2 | 1652.2 | 1645.7 | 1638.8 |
|               | 0.04911 | 1660.4 | 1654.1 | 1647.4 | 1640.2 |
|               | 0.06985 | 1662.3 | 1655.8 | 1648.9 | 1641.5 |
|               | 0.11608 | 1666.4 | 1659.3 | 1652.0 | 1644.2 |
|               | 0.16915 | 1670.7 | 1663.0 | 1655.2 | 1647.0 |
|               | 0.19264 | 1672.5 | 1664.5 | 1656.5 | 1648.2 |
|               | 0.23327 | 1675.3 | 1666.9 | 1658.6 | 1649.9 |
|               | 0.26404 | 1677.3 | 1668.6 | 1660.0 | 1651.2 |
| $x_w = 0.800$ | 0.00000 | 1700.2 | 1686.2 | 1672.0 | 1657.7 |
|               | 0.02631 | 1700.8 | 1686.6 | 1672.3 | 1657.9 |
|               | 0.05015 | 1701.3 | 1687.0 | 1672.6 | 1658.1 |
|               | 0.06965 | 1701.7 | 1687.3 | 1672.7 | 1658.2 |
|               | 0.12002 | 1702.5 | 1687.8 | 1673.0 | 1658.3 |

|               |         |        |        |        |        |
|---------------|---------|--------|--------|--------|--------|
|               | 0.16883 | 1703.2 | 1688.2 | 1673.2 | 1658.3 |
|               | 0.19503 | 1703.4 | 1688.4 | 1673.3 | 1658.2 |
|               | 0.23372 | 1703.7 | 1688.5 | 1673.3 | 1658.1 |
|               | 0.26945 | 1704.0 | 1688.6 | 1673.2 | 1657.9 |
| $x_W = 0.700$ | 0.00000 | 1687.8 | 1670.7 | 1653.5 | 1636.3 |
|               | 0.02721 | 1687.1 | 1669.9 | 1652.6 | 1635.4 |
|               | 0.05019 | 1686.5 | 1669.2 | 1651.9 | 1634.6 |
|               | 0.07042 | 1686.0 | 1668.7 | 1651.3 | 1634.1 |
|               | 0.11807 | 1684.7 | 1667.3 | 1649.8 | 1632.5 |
|               | 0.16552 | 1683.2 | 1665.6 | 1648.1 | 1630.7 |
|               | 0.19639 | 1682.4 | 1664.8 | 1647.2 | 1629.8 |
|               | 0.23262 | 1681.2 | 1663.5 | 1645.8 | 1628.4 |
|               | 0.26930 | 1680.0 | 1662.2 | 1644.5 | 1627.0 |
| $x_W = 0.600$ | 0.00000 | 1655.3 | 1637.0 | 1618.7 | 1600.4 |
|               | 0.02582 | 1654.3 | 1636.0 | 1617.6 | 1599.4 |
|               | 0.04807 | 1653.4 | 1635.1 | 1616.7 | 1598.4 |
|               | 0.07046 | 1652.6 | 1634.2 | 1615.8 | 1597.6 |
|               | 0.11933 | 1650.6 | 1632.2 | 1613.8 | 1595.5 |
|               | 0.16988 | 1648.5 | 1630.0 | 1611.6 | 1593.3 |
|               | 0.19224 | 1647.4 | 1628.9 | 1610.5 | 1592.2 |
|               | 0.23002 | 1645.8 | 1627.4 | 1608.9 | 1590.6 |
|               | 0.27268 | 1644.2 | 1625.7 | 1607.2 | 1588.9 |
| $x_W = 0.500$ | 0.00000 | 1617.3 | 1598.6 | 1579.9 | 1561.3 |
|               | 0.02620 | 1616.6 | 1597.9 | 1579.1 | 1560.5 |
|               | 0.04908 | 1615.5 | 1596.8 | 1578.1 | 1559.4 |
|               | 0.07135 | 1614.7 | 1596.0 | 1577.2 | 1558.5 |
|               | 0.11924 | 1612.9 | 1594.2 | 1575.4 | 1556.7 |
|               | 0.16660 | 1611.1 | 1592.3 | 1573.5 | 1554.8 |
|               | 0.19558 | 1610.1 | 1591.2 | 1572.4 | 1553.8 |
|               | 0.23001 | 1608.6 | 1589.7 | 1570.9 | 1552.3 |
|               | 0.27069 | 1607.0 | 1588.1 | 1569.3 | 1550.7 |
| $x_W = 0.400$ | 0.00000 | 1581.7 | 1562.8 | 1543.9 | 1525.1 |
|               | 0.02533 | 1581.0 | 1562.1 | 1543.2 | 1524.4 |

|               |         |        |        |        |        |
|---------------|---------|--------|--------|--------|--------|
|               | 0.04807 | 1580.3 | 1561.4 | 1542.5 | 1523.7 |
|               | 0.07303 | 1579.7 | 1560.7 | 1541.8 | 1523.1 |
|               | 0.12068 | 1578.3 | 1559.3 | 1540.4 | 1521.7 |
|               | 0.16770 | 1576.7 | 1557.8 | 1538.9 | 1520.1 |
|               | 0.19931 | 1575.9 | 1557.0 | 1538.1 | 1519.4 |
|               | 0.23383 | 1574.6 | 1555.7 | 1536.8 | 1518.1 |
|               | 0.27474 | 1573.2 | 1554.3 | 1535.4 | 1516.7 |
| <hr/>         |         |        |        |        |        |
| $x_W = 0.300$ | 0.00000 | 1549.7 | 1530.6 | 1511.6 | 1492.8 |
|               | 0.02667 | 1549.3 | 1530.3 | 1511.2 | 1492.4 |
|               | 0.05097 | 1548.8 | 1529.7 | 1510.7 | 1491.9 |
|               | 0.07071 | 1548.4 | 1529.3 | 1510.3 | 1491.4 |
|               | 0.11946 | 1547.4 | 1528.4 | 1509.4 | 1490.5 |
|               | 0.16816 | 1546.4 | 1527.4 | 1508.3 | 1489.5 |
|               | 0.19414 | 1545.8 | 1526.9 | 1507.8 | 1488.9 |
|               | 0.23318 | 1545.0 | 1526.0 | 1507.0 | 1488.1 |
|               | 0.27451 | 1543.9 | 1524.8 | 1505.9 | 1487.0 |
| <hr/>         |         |        |        |        |        |
| $x_W = 0.200$ | 0.00000 | 1522.5 | 1503.3 | 1484.1 | 1465.1 |
|               | 0.02406 | 1522.3 | 1503.1 | 1483.9 | 1464.9 |
|               | 0.05074 | 1522.1 | 1502.8 | 1483.7 | 1464.6 |
|               | 0.06912 | 1521.9 | 1502.6 | 1483.4 | 1464.4 |
|               | 0.12024 | 1521.3 | 1502.0 | 1482.8 | 1463.8 |
|               | 0.17291 | 1520.6 | 1501.4 | 1482.2 | 1463.2 |
|               | 0.19690 | 1520.3 | 1501.1 | 1481.9 | 1462.9 |
|               | 0.23388 | 1519.7 | 1500.5 | 1481.3 | 1462.3 |
|               | 0.26538 | 1518.9 | 1499.7 | 1480.5 | 1461.5 |
| <hr/>         |         |        |        |        |        |
| $x_W = 0.100$ | 0.00000 | 1497.6 | 1478.2 | 1458.9 | 1439.9 |
|               | 0.02556 | 1497.6 | 1478.2 | 1458.9 | 1439.9 |
|               | 0.04951 | 1497.6 | 1478.1 | 1458.9 | 1439.8 |
|               | 0.07371 | 1497.5 | 1478.1 | 1458.8 | 1439.7 |
|               | 0.12028 | 1497.3 | 1477.9 | 1458.6 | 1439.5 |
|               | 0.16628 | 1496.9 | 1477.5 | 1458.3 | 1439.2 |
|               | 0.19362 | 1496.7 | 1477.3 | 1458.1 | 1439.0 |
|               | 0.23091 | 1496.3 | 1477.0 | 1457.7 | 1438.7 |

|               |         |        |        |        |        |
|---------------|---------|--------|--------|--------|--------|
|               | 0.28006 | 1495.8 | 1476.5 | 1457.2 | 1438.2 |
| $x_w = 0.000$ | 0.00000 | 1478.6 | 1459.2 | 1439.8 | 1420.5 |
|               | 0.02672 | 1478.8 | 1459.4 | 1440.0 | 1420.7 |
|               | 0.04932 | 1479.0 | 1459.5 | 1440.1 | 1420.8 |
|               | 0.07293 | 1479.1 | 1459.6 | 1440.2 | 1420.9 |
|               | 0.12086 | 1479.2 | 1459.8 | 1440.3 | 1421.0 |
|               | 0.17102 | 1479.2 | 1459.7 | 1440.3 | 1421.0 |
|               | 0.19284 | 1479.1 | 1459.7 | 1440.3 | 1421.0 |
|               | 0.23187 | 1479.0 | 1459.5 | 1440.1 | 1420.8 |
|               | 0.28013 | 1478.6 | 1459.2 | 1439.8 | 1420.5 |

The uncertainty of the mole fraction  $x_w$  is equal to  $\pm 1 \cdot 10^{-3}$ . The uncertainty of molality is equal to  $\pm 1.5 \cdot 10^{-5} \text{ mol} \cdot \text{kg}^{-1}$ .

**Table S5.** The apparent molar volume of the pentaglyme in DMF + W mixture.

|               |                                       | $V_{\Phi,m} \cdot 10^6 / \text{m}^3 \cdot \text{mol}^{-1}$ |          |          |          |
|---------------|---------------------------------------|------------------------------------------------------------|----------|----------|----------|
|               | $m / \text{mol} \cdot \text{kg}^{-1}$ | 293.15 K                                                   | 298.15 K | 303.15 K | 308.15 K |
| $x_w = 1.000$ | 0.02720                               | 240.44                                                     | 241.66   | 242.95   | 244.15   |
|               | 0.04899                               | 240.32                                                     | 241.57   | 242.86   | 244.08   |
|               | 0.07406                               | 240.22                                                     | 241.46   | 242.77   | 244.02   |
|               | 0.12010                               | 240.01                                                     | 241.27   | 242.63   | 243.88   |
|               | 0.17162                               | 239.80                                                     | 241.06   | 242.46   | 243.73   |
|               | 0.19593                               | 239.69                                                     | 240.97   | 242.38   | 243.67   |
|               | 0.23202                               | 239.54                                                     | 240.83   | 242.26   | 243.57   |
|               | 0.26652                               | 239.40                                                     | 240.69   | 242.15   | 243.48   |
| $x_w = 0.980$ | 0.02290                               | 239.41                                                     | 240.83   | 242.18   | 243.57   |
|               | 0.05007                               | 239.36                                                     | 240.77   | 242.12   | 243.52   |
|               | 0.07274                               | 239.30                                                     | 240.73   | 242.09   | 243.50   |
|               | 0.12350                               | 239.20                                                     | 240.64   | 242.00   | 243.45   |
|               | 0.17066                               | 239.12                                                     | 240.56   | 241.94   | 243.40   |
|               | 0.19792                               | 239.08                                                     | 240.51   | 241.90   | 243.38   |
|               | 0.22953                               | 239.02                                                     | 240.46   | 241.86   | 243.35   |
|               | 0.26544                               | 238.96                                                     | 240.40   | 241.82   | 243.32   |
| $x_w = 0.960$ | 0.02556                               | 238.47                                                     | 239.90   | 241.34   | 242.86   |

|               |         |        |        |        |        |
|---------------|---------|--------|--------|--------|--------|
|               | 0.05031 | 238.46 | 239.92 | 241.35 | 242.88 |
|               | 0.07117 | 238.46 | 239.92 | 241.35 | 242.89 |
|               | 0.12387 | 238.43 | 239.90 | 241.36 | 242.91 |
|               | 0.17126 | 238.42 | 239.90 | 241.37 | 242.93 |
|               | 0.19723 | 238.41 | 239.90 | 241.38 | 242.94 |
|               | 0.23223 | 238.41 | 239.91 | 241.39 | 242.97 |
|               | 0.26541 | 238.40 | 239.92 | 241.40 | 242.99 |
| <hr/>         |         |        |        |        |        |
| $x_W = 0.940$ | 0.02549 | 237.86 | 239.43 | 241.01 | 242.66 |
|               | 0.04819 | 237.88 | 239.45 | 241.03 | 242.67 |
|               | 0.07117 | 237.91 | 239.48 | 241.05 | 242.69 |
|               | 0.12085 | 237.97 | 239.53 | 241.08 | 242.71 |
|               | 0.17119 | 238.02 | 239.57 | 241.12 | 242.75 |
|               | 0.19426 | 238.05 | 239.60 | 241.14 | 242.77 |
|               | 0.23011 | 238.10 | 239.63 | 241.17 | 242.79 |
|               | 0.26290 | 238.13 | 239.65 | 241.19 | 242.81 |
| <hr/>         |         |        |        |        |        |
| $x_W = 0.920$ | 0.02543 | 238.12 | 239.70 | 241.36 | 243.01 |
|               | 0.04882 | 238.15 | 239.71 | 241.38 | 243.03 |
|               | 0.07199 | 238.17 | 239.74 | 241.41 | 243.06 |
|               | 0.12158 | 238.23 | 239.80 | 241.47 | 243.12 |
|               | 0.17003 | 238.28 | 239.87 | 241.54 | 243.20 |
|               | 0.19963 | 238.33 | 239.92 | 241.59 | 243.25 |
|               | 0.23678 | 238.38 | 239.99 | 241.66 | 243.31 |
|               | 0.26349 | 238.42 | 240.04 | 241.69 | 243.36 |
| <hr/>         |         |        |        |        |        |
| $x_W = 0.900$ | 0.02802 | 238.98 | 240.69 | 242.31 | 243.91 |
|               | 0.05067 | 239.00 | 240.71 | 242.32 | 243.93 |
|               | 0.06925 | 239.04 | 240.72 | 242.35 | 243.94 |
|               | 0.12312 | 239.09 | 240.77 | 242.40 | 244.00 |
|               | 0.16960 | 239.16 | 240.81 | 242.45 | 244.05 |
|               | 0.19731 | 239.21 | 240.84 | 242.49 | 244.09 |
|               | 0.23046 | 239.26 | 240.89 | 242.53 | 244.13 |
|               | 0.26704 | 239.32 | 240.92 | 242.59 | 244.17 |
| <hr/>         |         |        |        |        |        |
| $x_W = 0.800$ | 0.02662 | 244.59 | 246.14 | 247.66 | 249.18 |
|               | 0.05278 | 244.64 | 246.19 | 247.70 | 249.21 |

|               |         |        |        |        |        |
|---------------|---------|--------|--------|--------|--------|
|               | 0.07110 | 244.68 | 246.22 | 247.74 | 249.23 |
|               | 0.12147 | 244.77 | 246.30 | 247.81 | 249.28 |
|               | 0.17142 | 244.87 | 246.40 | 247.90 | 249.34 |
|               | 0.19612 | 244.92 | 246.45 | 247.94 | 249.37 |
|               | 0.22873 | 245.00 | 246.52 | 248.00 | 249.42 |
|               | 0.26881 | 245.09 | 246.61 | 248.08 | 249.46 |
| $x_w = 0.700$ | 0.02926 | 249.78 | 251.12 | 252.47 | 253.86 |
|               | 0.05503 | 249.84 | 251.19 | 252.53 | 253.91 |
|               | 0.07243 | 249.89 | 251.22 | 252.58 | 253.95 |
|               | 0.12016 | 250.00 | 251.34 | 252.68 | 254.05 |
|               | 0.17029 | 250.14 | 251.48 | 252.81 | 254.18 |
|               | 0.19564 | 250.21 | 251.55 | 252.88 | 254.24 |
|               | 0.23316 | 250.32 | 251.66 | 252.98 | 254.33 |
|               | 0.26766 | 250.42 | 251.76 | 253.08 | 254.43 |
| $x_w = 0.600$ | 0.02648 | 253.37 | 254.71 | 256.00 | 257.39 |
|               | 0.04971 | 253.43 | 254.76 | 256.06 | 257.44 |
|               | 0.07105 | 253.49 | 254.81 | 256.11 | 257.48 |
|               | 0.12025 | 253.62 | 254.94 | 256.23 | 257.60 |
|               | 0.17040 | 253.75 | 255.08 | 256.37 | 257.72 |
|               | 0.19550 | 253.82 | 255.14 | 256.43 | 257.78 |
|               | 0.23012 | 253.92 | 255.23 | 256.52 | 257.86 |
|               | 0.26635 | 254.02 | 255.32 | 256.61 | 257.94 |
| $x_w = 0.500$ | 0.02201 | 255.78 | 257.10 | 258.44 | 259.81 |
|               | 0.05108 | 255.82 | 257.15 | 258.48 | 259.85 |
|               | 0.07481 | 255.85 | 257.20 | 258.51 | 259.88 |
|               | 0.12232 | 255.93 | 257.26 | 258.59 | 259.95 |
|               | 0.17008 | 256.02 | 257.34 | 258.68 | 260.02 |
|               | 0.19646 | 256.07 | 257.39 | 258.73 | 260.07 |
|               | 0.23312 | 256.15 | 257.46 | 258.79 | 260.12 |
|               | 0.27166 | 256.22 | 257.53 | 258.85 | 260.18 |
| $x_w = 0.400$ | 0.02618 | 257.08 | 258.46 | 259.82 | 261.14 |
|               | 0.05053 | 257.12 | 258.50 | 259.87 | 261.18 |
|               | 0.07297 | 257.17 | 258.54 | 259.90 | 261.22 |

|               |         |        |        |        |        |
|---------------|---------|--------|--------|--------|--------|
|               | 0.12102 | 257.25 | 258.61 | 259.97 | 261.30 |
|               | 0.17060 | 257.35 | 258.69 | 260.04 | 261.39 |
|               | 0.19577 | 257.40 | 258.73 | 260.08 | 261.44 |
|               | 0.23433 | 257.48 | 258.80 | 260.16 | 261.51 |
|               | 0.27634 | 257.56 | 258.87 | 260.22 | 261.58 |
| $x_W = 0.300$ | 0.02246 | 257.30 | 258.57 | 259.92 | 261.27 |
|               | 0.05194 | 257.34 | 258.62 | 259.96 | 261.31 |
|               | 0.07419 | 257.37 | 258.65 | 259.99 | 261.35 |
|               | 0.12146 | 257.45 | 258.73 | 260.06 | 261.40 |
|               | 0.16973 | 257.53 | 258.82 | 260.14 | 261.47 |
|               | 0.19491 | 257.58 | 258.87 | 260.19 | 261.51 |
|               | 0.23015 | 257.65 | 258.94 | 260.25 | 261.57 |
|               | 0.27596 | 257.73 | 259.02 | 260.32 | 261.64 |
| $x_W = 0.200$ | 0.02621 | 255.60 | 256.96 | 258.30 | 259.58 |
|               | 0.04975 | 255.67 | 257.01 | 258.35 | 259.62 |
|               | 0.07225 | 255.71 | 257.05 | 258.38 | 259.66 |
|               | 0.12419 | 255.84 | 257.16 | 258.48 | 259.75 |
|               | 0.16946 | 255.95 | 257.27 | 258.56 | 259.85 |
|               | 0.19216 | 256.02 | 257.32 | 258.60 | 259.88 |
|               | 0.23052 | 256.12 | 257.41 | 258.68 | 259.95 |
|               | 0.27650 | 256.22 | 257.51 | 258.76 | 260.05 |
| $x_W = 0.100$ | 0.02383 | 252.89 | 254.21 | 255.48 | 256.80 |
|               | 0.05002 | 253.04 | 254.34 | 255.62 | 256.94 |
|               | 0.07364 | 253.14 | 254.46 | 255.75 | 257.06 |
|               | 0.12204 | 253.42 | 254.73 | 256.02 | 257.32 |
|               | 0.17099 | 253.71 | 255.01 | 256.29 | 257.60 |
|               | 0.19562 | 253.86 | 255.16 | 256.44 | 257.75 |
|               | 0.23233 | 254.09 | 255.38 | 256.65 | 257.95 |
|               | 0.27585 | 254.33 | 255.66 | 256.91 | 258.17 |
| $x_W = 0.000$ | 0.02386 | 250.47 | 251.68 | 252.89 | 253.98 |
|               | 0.05145 | 250.77 | 252.02 | 253.21 | 254.31 |
|               | 0.07363 | 251.04 | 252.27 | 253.46 | 254.55 |
|               | 0.12070 | 251.63 | 252.83 | 253.99 | 255.12 |

|         |        |        |        |        |
|---------|--------|--------|--------|--------|
| 0.17089 | 252.28 | 253.45 | 254.59 | 255.73 |
| 0.19481 | 252.59 | 253.74 | 254.88 | 256.03 |
| 0.23328 | 253.10 | 254.24 | 255.35 | 256.51 |
| 0.27780 | 253.72 | 254.82 | 255.92 | 257.10 |

The uncertainty of the mole fraction  $x_w$  is equal to  $\pm 1 \cdot 10^{-3}$ . The uncertainty of molality is equal to  $\pm 1.5 \cdot 10^{-5} \text{ mol} \cdot \text{kg}^{-1}$ .

**Table S6.** The apparent molar volume of the hexaglyme in DMF + W mixture.

|                        |                                     | $V_{\Phi,\text{m}} \cdot 10^6 / \text{m}^3 \cdot \text{mol}^{-1}$ |          |          |          |
|------------------------|-------------------------------------|-------------------------------------------------------------------|----------|----------|----------|
|                        | $m/\text{mol} \cdot \text{kg}^{-1}$ | 293.15 K                                                          | 298.15 K | 303.15 K | 308.15 K |
| $x_{\text{w}} = 1.000$ | 0.02654                             | 279.12                                                            | 280.58   | 282.05   | 283.54   |
|                        | 0.04718                             | 279.00                                                            | 280.45   | 281.98   | 283.47   |
|                        | 0.07348                             | 278.88                                                            | 280.31   | 281.90   | 283.38   |
|                        | 0.12072                             | 278.65                                                            | 280.11   | 281.69   | 283.19   |
|                        | 0.16577                             | 278.43                                                            | 279.93   | 281.49   | 283.03   |
|                        | 0.19290                             | 278.30                                                            | 279.83   | 281.41   | 282.93   |
|                        | 0.23377                             | 278.11                                                            | 279.65   | 281.25   | 282.79   |
|                        | 0.26703                             | 277.94                                                            | 279.50   | 281.12   | 282.68   |
| $x_{\text{w}} = 0.980$ | 0.02630                             | 276.37                                                            | 277.93   | 279.48   | 281.01   |
|                        | 0.04688                             | 276.31                                                            | 277.89   | 279.42   | 280.99   |
|                        | 0.07142                             | 276.24                                                            | 277.84   | 279.37   | 280.94   |
|                        | 0.11931                             | 276.11                                                            | 277.74   | 279.28   | 280.86   |
|                        | 0.17341                             | 275.98                                                            | 277.63   | 279.20   | 280.78   |
|                        | 0.19399                             | 275.93                                                            | 277.59   | 279.18   | 280.75   |
|                        | 0.22823                             | 275.86                                                            | 277.51   | 279.09   | 280.70   |
|                        | 0.26482                             | 275.79                                                            | 277.43   | 279.02   | 280.66   |
| $x_{\text{w}} = 0.960$ | 0.02806                             | 275.29                                                            | 277.05   | 278.80   | 280.47   |
|                        | 0.04993                             | 275.25                                                            | 277.01   | 278.78   | 280.45   |
|                        | 0.06868                             | 275.24                                                            | 276.99   | 278.77   | 280.44   |
|                        | 0.11870                             | 275.19                                                            | 276.95   | 278.73   | 280.40   |
|                        | 0.16749                             | 275.16                                                            | 276.92   | 278.68   | 280.35   |
|                        | 0.19471                             | 275.15                                                            | 276.89   | 278.66   | 280.33   |
|                        | 0.23961                             | 275.08                                                            | 276.85   | 278.63   | 280.31   |

|               |         |        |        |        |        |
|---------------|---------|--------|--------|--------|--------|
|               | 0.26936 | 275.05 | 276.82 | 278.60 | 280.28 |
| $x_W = 0.940$ | 0.02764 | 274.43 | 276.25 | 278.13 | 279.94 |
|               | 0.04917 | 274.44 | 276.26 | 278.15 | 279.95 |
|               | 0.06764 | 274.46 | 276.28 | 278.17 | 279.96 |
|               | 0.11687 | 274.48 | 276.31 | 278.19 | 279.98 |
|               | 0.16487 | 274.51 | 276.34 | 278.23 | 280.00 |
|               | 0.19164 | 274.53 | 276.36 | 278.25 | 280.01 |
|               | 0.23578 | 274.58 | 276.40 | 278.28 | 280.04 |
|               | 0.26501 | 274.61 | 276.41 | 278.31 | 280.06 |
| $x_W = 0.920$ | 0.02492 | 274.92 | 276.84 | 278.63 | 280.45 |
|               | 0.04866 | 274.95 | 276.87 | 278.66 | 280.48 |
|               | 0.07143 | 274.99 | 276.90 | 278.68 | 280.51 |
|               | 0.11787 | 275.05 | 276.95 | 278.73 | 280.54 |
|               | 0.17385 | 275.14 | 277.00 | 278.80 | 280.60 |
|               | 0.20086 | 275.18 | 277.04 | 278.83 | 280.63 |
|               | 0.22911 | 275.24 | 277.09 | 278.87 | 280.67 |
|               | 0.25937 | 275.28 | 277.14 | 278.91 | 280.70 |
| $x_W = 0.900$ | 0.02702 | 275.58 | 277.39 | 279.23 | 281.00 |
|               | 0.04911 | 275.61 | 277.42 | 279.25 | 281.02 |
|               | 0.06985 | 275.61 | 277.44 | 279.27 | 281.04 |
|               | 0.11608 | 275.66 | 277.49 | 279.32 | 281.09 |
|               | 0.16915 | 275.72 | 277.55 | 279.38 | 281.14 |
|               | 0.19264 | 275.75 | 277.58 | 279.41 | 281.17 |
|               | 0.23327 | 275.82 | 277.64 | 279.46 | 281.22 |
|               | 0.26404 | 275.87 | 277.67 | 279.50 | 281.25 |
| $x_W = 0.800$ | 0.02631 | 281.50 | 283.10 | 284.72 | 286.51 |
|               | 0.05015 | 281.55 | 283.14 | 284.77 | 286.57 |
|               | 0.06965 | 281.63 | 283.20 | 284.81 | 286.62 |
|               | 0.12002 | 281.77 | 283.33 | 284.93 | 286.74 |
|               | 0.16883 | 281.89 | 283.45 | 285.03 | 286.85 |
|               | 0.19503 | 281.95 | 283.52 | 285.09 | 286.90 |
|               | 0.23372 | 282.05 | 283.62 | 285.19 | 287.00 |
|               | 0.26945 | 282.15 | 283.71 | 285.28 | 287.10 |

|               |         |        |        |        |        |
|---------------|---------|--------|--------|--------|--------|
| $x_W = 0.700$ | 0.02721 | 287.66 | 289.22 | 290.82 | 292.37 |
|               | 0.05019 | 287.69 | 289.26 | 290.86 | 292.40 |
|               | 0.07042 | 287.73 | 289.30 | 290.89 | 292.44 |
|               | 0.11807 | 287.82 | 289.38 | 290.95 | 292.52 |
|               | 0.16552 | 287.91 | 289.46 | 291.03 | 292.60 |
|               | 0.19639 | 287.98 | 289.52 | 291.08 | 292.66 |
|               | 0.23262 | 288.06 | 289.59 | 291.15 | 292.72 |
|               | 0.26930 | 288.12 | 289.65 | 291.20 | 292.78 |
| $x_W = 0.600$ | 0.02582 | 291.83 | 293.30 | 294.79 | 296.29 |
|               | 0.04807 | 291.87 | 293.34 | 294.83 | 296.34 |
|               | 0.07046 | 291.91 | 293.38 | 294.87 | 296.37 |
|               | 0.11933 | 291.99 | 293.45 | 294.94 | 296.45 |
|               | 0.16988 | 292.08 | 293.54 | 295.03 | 296.53 |
|               | 0.19224 | 292.13 | 293.58 | 295.07 | 296.57 |
|               | 0.23002 | 292.20 | 293.66 | 295.14 | 296.63 |
|               | 0.27268 | 292.28 | 293.73 | 295.21 | 296.70 |
| $x_W = 0.500$ | 0.02620 | 294.78 | 296.26 | 297.77 | 299.30 |
|               | 0.04908 | 294.81 | 296.29 | 297.81 | 299.33 |
|               | 0.07135 | 294.84 | 296.32 | 297.83 | 299.35 |
|               | 0.11924 | 294.90 | 296.38 | 297.89 | 299.42 |
|               | 0.16660 | 294.97 | 296.45 | 297.96 | 299.48 |
|               | 0.19558 | 295.02 | 296.50 | 298.01 | 299.53 |
|               | 0.23001 | 295.08 | 296.55 | 298.06 | 299.58 |
|               | 0.27069 | 295.15 | 296.61 | 298.11 | 299.64 |
| $x_W = 0.400$ | 0.02533 | 295.86 | 297.41 | 298.86 | 300.41 |
|               | 0.04807 | 295.88 | 297.43 | 298.89 | 300.44 |
|               | 0.07303 | 295.91 | 297.45 | 298.92 | 300.47 |
|               | 0.12068 | 295.96 | 297.49 | 298.96 | 300.51 |
|               | 0.16770 | 296.03 | 297.54 | 299.02 | 300.57 |
|               | 0.19931 | 296.07 | 297.58 | 299.07 | 300.61 |
|               | 0.23383 | 296.11 | 297.61 | 299.11 | 300.65 |
|               | 0.27474 | 296.16 | 297.65 | 299.16 | 300.69 |
| $x_W = 0.300$ | 0.02667 | 295.54 | 297.03 | 298.58 | 300.12 |

|               |         |        |        |        |        |
|---------------|---------|--------|--------|--------|--------|
|               | 0.05097 | 295.58 | 297.07 | 298.62 | 300.15 |
|               | 0.07071 | 295.61 | 297.10 | 298.65 | 300.19 |
|               | 0.11946 | 295.70 | 297.19 | 298.73 | 300.25 |
|               | 0.16816 | 295.77 | 297.28 | 298.80 | 300.32 |
|               | 0.19414 | 295.83 | 297.33 | 298.84 | 300.36 |
|               | 0.23318 | 295.91 | 297.41 | 298.91 | 300.43 |
|               | 0.27451 | 295.98 | 297.47 | 298.98 | 300.49 |
| <hr/>         |         |        |        |        |        |
| $x_w = 0.200$ | 0.02406 | 293.33 | 294.78 | 296.33 | 297.88 |
|               | 0.05074 | 293.39 | 294.85 | 296.38 | 297.93 |
|               | 0.06912 | 293.43 | 294.90 | 296.41 | 297.96 |
|               | 0.12024 | 293.55 | 295.00 | 296.49 | 298.04 |
|               | 0.17291 | 293.68 | 295.14 | 296.59 | 298.14 |
|               | 0.19690 | 293.75 | 295.20 | 296.64 | 298.18 |
|               | 0.23388 | 293.85 | 295.29 | 296.73 | 298.26 |
|               | 0.26538 | 293.92 | 295.36 | 296.80 | 298.31 |
| <hr/>         |         |        |        |        |        |
| $x_w = 0.100$ | 0.02556 | 290.71 | 292.10 | 293.71 | 295.16 |
|               | 0.04951 | 290.86 | 292.30 | 293.85 | 295.30 |
|               | 0.07371 | 291.01 | 292.48 | 293.99 | 295.47 |
|               | 0.12028 | 291.32 | 292.82 | 294.32 | 295.77 |
|               | 0.16628 | 291.65 | 293.19 | 294.65 | 296.09 |
|               | 0.19362 | 291.85 | 293.41 | 294.86 | 296.29 |
|               | 0.23091 | 292.14 | 293.73 | 295.15 | 296.57 |
|               | 0.28006 | 292.54 | 294.16 | 295.55 | 296.96 |
| <hr/>         |         |        |        |        |        |
| $x_w = 0.000$ | 0.02672 | 287.74 | 289.14 | 290.58 | 291.96 |
|               | 0.04932 | 288.06 | 289.45 | 290.90 | 292.27 |
|               | 0.07293 | 288.43 | 289.79 | 291.24 | 292.58 |
|               | 0.12086 | 289.19 | 290.49 | 291.99 | 293.26 |
|               | 0.17102 | 290.01 | 291.26 | 292.80 | 293.99 |
|               | 0.19284 | 290.37 | 291.60 | 293.16 | 294.32 |
|               | 0.23187 | 291.05 | 292.23 | 293.82 | 294.92 |
|               | 0.28013 | 291.91 | 293.04 | 294.67 | 295.69 |

The uncertainty of the mole fraction  $x_w$  is equal to  $\pm 1 \cdot 10^{-3}$ . The uncertainty of molality is equal to  $\pm 1.5 \cdot 10^{-5} \text{ mol} \cdot \text{kg}^{-1}$ .

**Table S7.** Isentropic compressibility coefficient of the pentaglyme + DMF + W solution.

|               |                                       | $\kappa_S \cdot 10^{10} / \text{Pa}^{-1}$ |          |          |          |
|---------------|---------------------------------------|-------------------------------------------|----------|----------|----------|
|               | $m/(\text{mol} \cdot \text{kg}^{-1})$ | 293.15 K                                  | 298.15 K | 303.15 K | 308.15 K |
| $x_W = 1.000$ | 0.00000                               | 4.55450                                   | 4.47369  | 4.40664  | 4.35249  |
|               | 0.02720                               | 4.52376                                   | 4.44623  | 4.38222  | 4.33032  |
|               | 0.04899                               | 4.49939                                   | 4.42433  | 4.36259  | 4.31282  |
|               | 0.07406                               | 4.47124                                   | 4.39990  | 4.34046  | 4.29286  |
|               | 0.12010                               | 4.42030                                   | 4.35493  | 4.30053  | 4.25654  |
|               | 0.17162                               | 4.36439                                   | 4.30554  | 4.25615  | 4.21634  |
|               | 0.19593                               | 4.33813                                   | 4.28215  | 4.23603  | 4.19714  |
|               | 0.23202                               | 4.30006                                   | 4.24829  | 4.20560  | 4.16944  |
|               | 0.26652                               | 4.26433                                   | 4.21663  | 4.17673  | 4.14323  |
| $x_W = 0.980$ | 0.00000                               | 4.25744                                   | 4.21482  | 4.18188  | 4.15824  |
|               | 0.02290                               | 4.23598                                   | 4.19541  | 4.16494  | 4.14259  |
|               | 0.05007                               | 4.21148                                   | 4.17299  | 4.14447  | 4.12451  |
|               | 0.07274                               | 4.19041                                   | 4.15446  | 4.12781  | 4.10964  |
|               | 0.12350                               | 4.14498                                   | 4.11247  | 4.09008  | 4.07601  |
|               | 0.17066                               | 4.10335                                   | 4.07464  | 4.05586  | 4.04525  |
|               | 0.19792                               | 4.07952                                   | 4.05325  | 4.03677  | 4.02790  |
|               | 0.22953                               | 4.05185                                   | 4.02802  | 4.01438  | 4.00775  |
|               | 0.26544                               | 4.02149                                   | 4.00010  | 3.98878  | 3.98489  |
| $x_W = 0.960$ | 0.00000                               | 4.03855                                   | 4.02365  | 4.01620  | 4.01456  |
|               | 0.02556                               | 4.01726                                   | 4.00461  | 3.99833  | 3.99884  |
|               | 0.05031                               | 3.99675                                   | 3.98633  | 3.98170  | 3.98382  |
|               | 0.07117                               | 3.98036                                   | 3.97109  | 3.96807  | 3.97127  |
|               | 0.12387                               | 3.93982                                   | 3.93437  | 3.93457  | 3.94142  |
|               | 0.17126                               | 3.90491                                   | 3.90267  | 3.90551  | 3.91543  |
|               | 0.19723                               | 3.88670                                   | 3.88604  | 3.89043  | 3.90186  |
|               | 0.23223                               | 3.86293                                   | 3.86388  | 3.87078  | 3.88374  |
|               | 0.26541                               | 3.84055                                   | 3.84402  | 3.85245  | 3.86739  |
| $x_W = 0.940$ | 0.00000                               | 3.86323                                   | 3.87182  | 3.88401  | 3.90072  |
|               | 0.02549                               | 3.84559                                   | 3.85519  | 3.86935  | 3.88802  |
|               | 0.04819                               | 3.83029                                   | 3.84089  | 3.85699  | 3.87664  |

|               |         |         |         |         |         |
|---------------|---------|---------|---------|---------|---------|
|               | 0.07117 | 3.81508 | 3.82666 | 3.84420 | 3.86529 |
|               | 0.12085 | 3.78369 | 3.79674 | 3.81806 | 3.84154 |
|               | 0.17119 | 3.75318 | 3.76814 | 3.79269 | 3.81899 |
|               | 0.19426 | 3.73945 | 3.75534 | 3.78172 | 3.80848 |
|               | 0.23011 | 3.71915 | 3.73643 | 3.76506 | 3.79367 |
|               | 0.26290 | 3.70116 | 3.71936 | 3.75020 | 3.78018 |
| <hr/>         |         |         |         |         |         |
| $x_w = 0.920$ | 0.00000 | 3.74189 | 3.76484 | 3.79172 | 3.82218 |
|               | 0.02543 | 3.72734 | 3.75165 | 3.77990 | 3.81127 |
|               | 0.04882 | 3.71448 | 3.73968 | 3.76928 | 3.80156 |
|               | 0.07199 | 3.70218 | 3.72826 | 3.75921 | 3.79194 |
|               | 0.12158 | 3.67707 | 3.70536 | 3.73852 | 3.77305 |
|               | 0.17003 | 3.65420 | 3.68467 | 3.72003 | 3.75589 |
|               | 0.19963 | 3.64085 | 3.67262 | 3.70973 | 3.74649 |
|               | 0.23678 | 3.62562 | 3.65868 | 3.69708 | 3.73472 |
|               | 0.26349 | 3.61495 | 3.64886 | 3.68856 | 3.72708 |
| <hr/>         |         |         |         |         |         |
| $x_w = 0.900$ | 0.00000 | 3.64354 | 3.67921 | 3.71855 | 3.76068 |
|               | 0.02802 | 3.63068 | 3.66763 | 3.70779 | 3.75123 |
|               | 0.05067 | 3.62061 | 3.65841 | 3.69940 | 3.74369 |
|               | 0.06925 | 3.61231 | 3.65094 | 3.69278 | 3.73748 |
|               | 0.12312 | 3.58910 | 3.62980 | 3.67371 | 3.72054 |
|               | 0.16960 | 3.57033 | 3.61265 | 3.65818 | 3.70625 |
|               | 0.19731 | 3.55937 | 3.60291 | 3.64924 | 3.69814 |
|               | 0.23046 | 3.54676 | 3.59107 | 3.63861 | 3.68876 |
|               | 0.26704 | 3.53314 | 3.57906 | 3.62737 | 3.67876 |
| <hr/>         |         |         |         |         |         |
| $x_w = 0.800$ | 0.00000 | 3.45677 | 3.52380 | 3.59447 | 3.66868 |
|               | 0.02662 | 3.45315 | 3.52074 | 3.59191 | 3.66651 |
|               | 0.05278 | 3.44993 | 3.51797 | 3.58954 | 3.66458 |
|               | 0.07110 | 3.44772 | 3.51607 | 3.58798 | 3.66328 |
|               | 0.12147 | 3.44207 | 3.51138 | 3.58409 | 3.66017 |
|               | 0.17142 | 3.43714 | 3.50731 | 3.58086 | 3.65764 |
|               | 0.19612 | 3.43490 | 3.50552 | 3.57946 | 3.65659 |
|               | 0.22873 | 3.43224 | 3.50343 | 3.57788 | 3.65545 |
|               | 0.26881 | 3.42928 | 3.50118 | 3.57623 | 3.65434 |

|               |         |         |         |         |         |
|---------------|---------|---------|---------|---------|---------|
| $x_w = 0.700$ | 0.00000 | 3.52061 | 3.60912 | 3.70067 | 3.79601 |
|               | 0.02926 | 3.52118 | 3.61032 | 3.70226 | 3.79799 |
|               | 0.05503 | 3.52229 | 3.61125 | 3.70376 | 3.79981 |
|               | 0.07243 | 3.52293 | 3.61236 | 3.70530 | 3.80097 |
|               | 0.12016 | 3.52505 | 3.61498 | 3.70807 | 3.80498 |
|               | 0.17029 | 3.52753 | 3.61814 | 3.71187 | 3.80945 |
|               | 0.19564 | 3.52901 | 3.61993 | 3.71398 | 3.81190 |
|               | 0.23316 | 3.53141 | 3.62276 | 3.71727 | 3.81565 |
|               | 0.26766 | 3.53385 | 3.62561 | 3.72053 | 3.81935 |
| $x_w = 0.600$ | 0.00000 | 3.69117 | 3.78475 | 3.88439 | 3.99115 |
|               | 0.02648 | 3.69397 | 3.78777 | 3.88765 | 3.99462 |
|               | 0.04971 | 3.69614 | 3.79041 | 3.89090 | 3.99752 |
|               | 0.07105 | 3.69888 | 3.79314 | 3.89336 | 4.00061 |
|               | 0.12025 | 3.70463 | 3.79934 | 3.89998 | 4.00759 |
|               | 0.17040 | 3.71091 | 3.80566 | 3.90707 | 4.01501 |
|               | 0.19550 | 3.71401 | 3.80959 | 3.91078 | 4.01914 |
|               | 0.23012 | 3.71885 | 3.81458 | 3.91604 | 4.02429 |
|               | 0.26635 | 3.72398 | 3.81998 | 3.92171 | 4.03017 |
| $x_w = 0.500$ | 0.00000 | 3.89235 | 4.00296 | 4.11824 | 4.23779 |
|               | 0.02201 | 3.89462 | 4.00541 | 4.12086 | 4.24049 |
|               | 0.05108 | 3.89795 | 4.00906 | 4.12464 | 4.24462 |
|               | 0.07481 | 3.90037 | 4.01160 | 4.12732 | 4.24722 |
|               | 0.12232 | 3.90593 | 4.01744 | 4.13349 | 4.25359 |
|               | 0.17008 | 3.91178 | 4.02367 | 4.14009 | 4.26024 |
|               | 0.19646 | 3.91536 | 4.02758 | 4.14366 | 4.26438 |
|               | 0.23312 | 3.92002 | 4.03235 | 4.14898 | 4.26952 |
|               | 0.27166 | 3.92537 | 4.03796 | 4.15480 | 4.27540 |
| $x_w = 0.400$ | 0.00000 | 4.10797 | 4.22273 | 4.34387 | 4.47262 |
|               | 0.02618 | 4.11004 | 4.22448 | 4.34622 | 4.47516 |
|               | 0.05053 | 4.11220 | 4.22709 | 4.34818 | 4.47757 |
|               | 0.07297 | 4.11416 | 4.22920 | 4.35074 | 4.47944 |
|               | 0.12102 | 4.11836 | 4.23379 | 4.35562 | 4.48499 |
|               | 0.17060 | 4.12322 | 4.23894 | 4.36081 | 4.49046 |

|               |         |         |         |         |         |
|---------------|---------|---------|---------|---------|---------|
|               | 0.19577 | 4.12583 | 4.24151 | 4.36386 | 4.49360 |
|               | 0.23433 | 4.13014 | 4.24618 | 4.36836 | 4.49833 |
|               | 0.27634 | 4.13481 | 4.25100 | 4.37341 | 4.50366 |
| $x_w = 0.300$ | 0.00000 | 4.31177 | 4.44153 | 4.57658 | 4.71634 |
|               | 0.02246 | 4.31250 | 4.44249 | 4.57749 | 4.71783 |
|               | 0.05194 | 4.31429 | 4.44439 | 4.57975 | 4.71978 |
|               | 0.07419 | 4.31538 | 4.44571 | 4.58128 | 4.72160 |
|               | 0.12146 | 4.31844 | 4.44884 | 4.58471 | 4.72491 |
|               | 0.16973 | 4.32177 | 4.45277 | 4.58862 | 4.72961 |
|               | 0.19491 | 4.32358 | 4.45451 | 4.59077 | 4.73193 |
|               | 0.23015 | 4.32655 | 4.45753 | 4.59419 | 4.73541 |
|               | 0.27596 | 4.33055 | 4.46180 | 4.59851 | 4.74019 |
| $x_w = 0.200$ | 0.00000 | 4.49783 | 4.63246 | 4.77458 | 4.92398 |
|               | 0.02621 | 4.49766 | 4.63239 | 4.77461 | 4.92411 |
|               | 0.04975 | 4.49737 | 4.63218 | 4.77456 | 4.92415 |
|               | 0.07225 | 4.49768 | 4.63266 | 4.77509 | 4.92466 |
|               | 0.12419 | 4.49828 | 4.63347 | 4.77606 | 4.92574 |
|               | 0.16946 | 4.49932 | 4.63442 | 4.77723 | 4.92728 |
|               | 0.19216 | 4.49986 | 4.63543 | 4.77824 | 4.92824 |
|               | 0.23052 | 4.50148 | 4.63697 | 4.77987 | 4.92999 |
|               | 0.27650 | 4.50368 | 4.63930 | 4.78226 | 4.93248 |
| $x_w = 0.100$ | 0.00000 | 4.67487 | 4.82249 | 4.97583 | 5.13428 |
|               | 0.02383 | 4.67315 | 4.82074 | 4.97404 | 5.13274 |
|               | 0.05002 | 4.67141 | 4.81883 | 4.97209 | 5.13083 |
|               | 0.07364 | 4.66983 | 4.81762 | 4.97072 | 5.12945 |
|               | 0.12204 | 4.66787 | 4.81538 | 4.96866 | 5.12717 |
|               | 0.17099 | 4.66641 | 4.81385 | 4.96714 | 5.12559 |
|               | 0.19562 | 4.66591 | 4.81324 | 4.96659 | 5.12521 |
|               | 0.23233 | 4.66565 | 4.81307 | 4.96626 | 5.12478 |
|               | 0.27585 | 4.66586 | 4.81295 | 4.96639 | 5.12484 |
| $x_w = 0.000$ | 0.00000 | 4.83034 | 4.98376 | 5.14480 | 5.31415 |
|               | 0.02386 | 4.82692 | 4.98022 | 5.14115 | 5.31042 |
|               | 0.05145 | 4.82325 | 4.97643 | 5.13729 | 5.30648 |

|         |         |         |         |         |
|---------|---------|---------|---------|---------|
| 0.07363 | 4.82052 | 4.97368 | 5.13444 | 5.30352 |
| 0.12070 | 4.81560 | 4.96838 | 5.12916 | 5.29798 |
| 0.17089 | 4.81151 | 4.96415 | 5.12462 | 5.29344 |
| 0.19481 | 4.80978 | 4.96242 | 5.12276 | 5.29166 |
| 0.23328 | 4.80782 | 4.96024 | 5.12055 | 5.28932 |
| 0.27780 | 4.80621 | 4.95862 | 5.11871 | 5.28752 |

The uncertainty of the mole fraction  $x_w$  is equal to  $\pm 1 \cdot 10^{-3}$ . The uncertainty of molality is equal to  $\pm 1.5 \cdot 10^{-5} \text{ mol} \cdot \text{kg}^{-1}$ .

**Table S8.** Isentropic compressibility coefficient of the hexaglyme + DMF + W solution.

| $\kappa_S \cdot 10^{10} / \text{Pa}^{-1}$ |                                       |          |          |          |          |
|-------------------------------------------|---------------------------------------|----------|----------|----------|----------|
|                                           | $m/(\text{mol} \cdot \text{kg}^{-1})$ | 293.15 K | 298.15 K | 303.15 K | 308.15 K |
| $x_w = 1.000$                             | 0.00000                               | 4.55203  | 4.47667  | 4.40375  | 4.35018  |
|                                           | 0.02654                               | 4.51711  | 4.44509  | 4.37595  | 4.32527  |
|                                           | 0.04718                               | 4.49002  | 4.42109  | 4.35433  | 4.30580  |
|                                           | 0.07348                               | 4.45585  | 4.39073  | 4.32704  | 4.28132  |
|                                           | 0.12072                               | 4.39579  | 4.33675  | 4.27836  | 4.23803  |
|                                           | 0.16577                               | 4.33951  | 4.28631  | 4.23353  | 4.19676  |
|                                           | 0.19290                               | 4.30636  | 4.25613  | 4.20619  | 4.17260  |
|                                           | 0.23377                               | 4.25676  | 4.21145  | 4.16621  | 4.13650  |
|                                           | 0.26703                               | 4.21719  | 4.17593  | 4.13405  | 4.10749  |
| $x_w = 0.980$                             | 0.00000                               | 4.25300  | 4.21103  | 4.17595  | 4.15342  |
|                                           | 0.02630                               | 4.22435  | 4.18510  | 4.15312  | 4.13248  |
|                                           | 0.04688                               | 4.20226  | 4.16503  | 4.13497  | 4.11666  |
|                                           | 0.07142                               | 4.17657  | 4.14139  | 4.11380  | 4.09731  |
|                                           | 0.11931                               | 4.12608  | 4.09597  | 4.07319  | 4.06078  |
|                                           | 0.17341                               | 4.07054  | 4.04542  | 4.02791  | 4.01951  |
|                                           | 0.19399                               | 4.04973  | 4.02644  | 4.01068  | 4.00444  |
|                                           | 0.22823                               | 4.01508  | 3.99530  | 3.98291  | 3.97888  |
|                                           | 0.26482                               | 3.97911  | 3.96229  | 3.95321  | 3.95187  |
| $x_w = 0.960$                             | 0.00000                               | 4.04059  | 4.02622  | 4.01874  | 4.01761  |
|                                           | 0.02806                               | 4.01310  | 4.00156  | 3.99632  | 3.99734  |
|                                           | 0.04993                               | 3.99233  | 3.98300  | 3.97891  | 3.98154  |

|               |         |         |         |         |         |
|---------------|---------|---------|---------|---------|---------|
|               | 0.06868 | 3.97466 | 3.96699 | 3.96453 | 3.96822 |
|               | 0.11870 | 3.92918 | 3.92633 | 3.92661 | 3.93442 |
|               | 0.16749 | 3.88716 | 3.88849 | 3.89191 | 3.90227 |
|               | 0.19471 | 3.86441 | 3.86779 | 3.87275 | 3.88510 |
|               | 0.23961 | 3.82832 | 3.83520 | 3.84268 | 3.85748 |
|               | 0.26936 | 3.80492 | 3.81426 | 3.82322 | 3.83994 |
| <hr/>         |         |         |         |         |         |
| $x_w = 0.940$ | 0.00000 | 3.87428 | 3.88098 | 3.89273 | 3.90948 |
|               | 0.02764 | 3.85171 | 3.85995 | 3.87368 | 3.89239 |
|               | 0.04917 | 3.83448 | 3.84469 | 3.85941 | 3.87957 |
|               | 0.06764 | 3.82063 | 3.83136 | 3.84753 | 3.86913 |
|               | 0.11687 | 3.78555 | 3.79920 | 3.81779 | 3.84222 |
|               | 0.16487 | 3.75447 | 3.77051 | 3.79146 | 3.81869 |
|               | 0.19164 | 3.73833 | 3.75578 | 3.77767 | 3.80675 |
|               | 0.23578 | 3.71438 | 3.73324 | 3.75700 | 3.78789 |
|               | 0.26501 | 3.69968 | 3.71948 | 3.74416 | 3.77640 |
| <hr/>         |         |         |         |         |         |
| $x_w = 0.920$ | 0.00000 | 3.74371 | 3.76665 | 3.79357 | 3.82407 |
|               | 0.02492 | 3.72672 | 3.75148 | 3.77975 | 3.81162 |
|               | 0.04866 | 3.71139 | 3.73705 | 3.76665 | 3.79987 |
|               | 0.07143 | 3.69676 | 3.72375 | 3.75469 | 3.78926 |
|               | 0.11787 | 3.66820 | 3.69781 | 3.73092 | 3.76769 |
|               | 0.17385 | 3.63592 | 3.66808 | 3.70375 | 3.74310 |
|               | 0.20086 | 3.62099 | 3.65441 | 3.69135 | 3.73199 |
|               | 0.22911 | 3.60606 | 3.64073 | 3.67892 | 3.72039 |
|               | 0.25937 | 3.59020 | 3.62652 | 3.66596 | 3.70868 |
| <hr/>         |         |         |         |         |         |
| $x_w = 0.900$ | 0.00000 | 3.64969 | 3.68545 | 3.72441 | 3.76664 |
|               | 0.02702 | 3.63441 | 3.67142 | 3.71164 | 3.75470 |
|               | 0.04911 | 3.62206 | 3.66032 | 3.70136 | 3.74570 |
|               | 0.06985 | 3.61126 | 3.65034 | 3.69220 | 3.73738 |
|               | 0.11608 | 3.58805 | 3.62959 | 3.67310 | 3.71993 |
|               | 0.16915 | 3.56357 | 3.60754 | 3.65309 | 3.70156 |
|               | 0.19264 | 3.55331 | 3.59849 | 3.64485 | 3.69370 |
|               | 0.23327 | 3.53708 | 3.58384 | 3.63141 | 3.68192 |
|               | 0.26404 | 3.52543 | 3.57337 | 3.62217 | 3.67306 |

|               |         |         |         |         |         |
|---------------|---------|---------|---------|---------|---------|
| $x_W = 0.800$ | 0.00000 | 3.45983 | 3.53135 | 3.60581 | 3.68304 |
|               | 0.02631 | 3.45491 | 3.52699 | 3.60194 | 3.67958 |
|               | 0.05015 | 3.45066 | 3.52320 | 3.59858 | 3.67668 |
|               | 0.06965 | 3.44730 | 3.52025 | 3.59602 | 3.67444 |
|               | 0.12002 | 3.43927 | 3.51318 | 3.58984 | 3.66915 |
|               | 0.16883 | 3.43230 | 3.50714 | 3.58466 | 3.66476 |
|               | 0.19503 | 3.42890 | 3.50420 | 3.58220 | 3.66273 |
|               | 0.23372 | 3.42427 | 3.50029 | 3.57889 | 3.66010 |
|               | 0.26945 | 3.42042 | 3.49711 | 3.57628 | 3.65804 |
| $x_W = 0.700$ | 0.00000 | 3.52613 | 3.61464 | 3.70669 | 3.80213 |
|               | 0.02721 | 3.52656 | 3.61544 | 3.70785 | 3.80357 |
|               | 0.05019 | 3.52704 | 3.61630 | 3.70896 | 3.80490 |
|               | 0.07042 | 3.52762 | 3.61715 | 3.71006 | 3.80616 |
|               | 0.11807 | 3.52933 | 3.61953 | 3.71302 | 3.80960 |
|               | 0.16552 | 3.53157 | 3.62245 | 3.71654 | 3.81356 |
|               | 0.19639 | 3.53331 | 3.62470 | 3.71914 | 3.81646 |
|               | 0.23262 | 3.53570 | 3.62761 | 3.72249 | 3.82015 |
|               | 0.26930 | 3.53843 | 3.63089 | 3.72622 | 3.82422 |
| $x_W = 0.600$ | 0.00000 | 3.69195 | 3.79236 | 3.89690 | 4.00522 |
|               | 0.02582 | 3.69421 | 3.79489 | 3.89961 | 4.00811 |
|               | 0.04807 | 3.69625 | 3.79713 | 3.90206 | 4.01080 |
|               | 0.07046 | 3.69845 | 3.79954 | 3.90469 | 4.01356 |
|               | 0.11933 | 3.70358 | 3.80512 | 3.91070 | 4.01998 |
|               | 0.16988 | 3.70947 | 3.81148 | 3.91748 | 4.02719 |
|               | 0.19224 | 3.71225 | 3.81444 | 3.92063 | 4.03054 |
|               | 0.23002 | 3.71721 | 3.81973 | 3.92627 | 4.03646 |
|               | 0.27268 | 3.72317 | 3.82611 | 3.93300 | 4.04355 |
| $x_W = 0.500$ | 0.00000 | 3.89770 | 4.00833 | 4.12362 | 4.24326 |
|               | 0.02620 | 3.89988 | 4.01074 | 4.12627 | 4.24611 |
|               | 0.04908 | 3.90195 | 4.01297 | 4.12867 | 4.24869 |
|               | 0.07135 | 3.90399 | 4.01527 | 4.13115 | 4.25131 |
|               | 0.11924 | 3.90884 | 4.02053 | 4.13679 | 4.25725 |
|               | 0.16660 | 3.91407 | 4.02618 | 4.14283 | 4.26360 |

|               |         |         |         |         |         |
|---------------|---------|---------|---------|---------|---------|
|               | 0.19558 | 3.91750 | 4.02993 | 4.14677 | 4.26774 |
|               | 0.23001 | 3.92181 | 4.03456 | 4.15169 | 4.27284 |
|               | 0.27069 | 3.92725 | 4.04036 | 4.15783 | 4.27917 |
| $x_W = 0.400$ | 0.00000 | 4.10802 | 4.22852 | 4.35384 | 4.48370 |
|               | 0.02533 | 4.10928 | 4.22988 | 4.35528 | 4.48530 |
|               | 0.04807 | 4.11050 | 4.23119 | 4.35673 | 4.48685 |
|               | 0.07303 | 4.11203 | 4.23282 | 4.35846 | 4.48869 |
|               | 0.12068 | 4.11524 | 4.23623 | 4.36207 | 4.49252 |
|               | 0.16770 | 4.11892 | 4.24006 | 4.36613 | 4.49675 |
|               | 0.19931 | 4.12161 | 4.24291 | 4.36908 | 4.49987 |
|               | 0.23383 | 4.12483 | 4.24624 | 4.37260 | 4.50346 |
|               | 0.27474 | 4.12901 | 4.25057 | 4.37706 | 4.50809 |
| $x_W = 0.300$ | 0.00000 | 4.31179 | 4.44154 | 4.57658 | 4.71636 |
|               | 0.02667 | 4.31150 | 4.44128 | 4.57637 | 4.71617 |
|               | 0.05097 | 4.31134 | 4.44122 | 4.57634 | 4.71625 |
|               | 0.07071 | 4.31137 | 4.44127 | 4.57643 | 4.71637 |
|               | 0.11946 | 4.31180 | 4.44180 | 4.57705 | 4.71703 |
|               | 0.16816 | 4.31292 | 4.44292 | 4.57822 | 4.71832 |
|               | 0.19414 | 4.31370 | 4.44377 | 4.57907 | 4.71925 |
|               | 0.23318 | 4.31529 | 4.44536 | 4.58072 | 4.72095 |
|               | 0.27451 | 4.31735 | 4.44745 | 4.58287 | 4.72319 |
| $x_W = 0.200$ | 0.00000 | 4.49688 | 4.63554 | 4.77997 | 4.92962 |
|               | 0.02406 | 4.49495 | 4.63363 | 4.77803 | 4.92764 |
|               | 0.05074 | 4.49298 | 4.63168 | 4.77604 | 4.92568 |
|               | 0.06912 | 4.49180 | 4.63043 | 4.77483 | 4.92452 |
|               | 0.12024 | 4.48907 | 4.62765 | 4.77195 | 4.92167 |
|               | 0.17291 | 4.48711 | 4.62562 | 4.76989 | 4.91962 |
|               | 0.19690 | 4.48651 | 4.62497 | 4.76923 | 4.91897 |
|               | 0.23388 | 4.48602 | 4.62439 | 4.76859 | 4.91830 |
|               | 0.26538 | 4.48594 | 4.62422 | 4.76837 | 4.91811 |
| $x_W = 0.100$ | 0.00000 | 4.67488 | 4.82254 | 4.97583 | 5.13428 |
|               | 0.02556 | 4.67104 | 4.81861 | 4.97179 | 5.13012 |
|               | 0.04951 | 4.66772 | 4.81517 | 4.96825 | 5.12646 |

|               |         |         |         |         |         |
|---------------|---------|---------|---------|---------|---------|
|               | 0.07371 | 4.66463 | 4.81198 | 4.96496 | 5.12307 |
|               | 0.12028 | 4.65947 | 4.80651 | 4.95933 | 5.11727 |
|               | 0.16628 | 4.65531 | 4.80218 | 4.95473 | 5.11253 |
|               | 0.19362 | 4.65329 | 4.79999 | 4.95248 | 5.11014 |
|               | 0.23091 | 4.65104 | 4.79764 | 4.94992 | 5.10751 |
|               | 0.28006 | 4.64905 | 4.79547 | 4.94754 | 5.10493 |
| $x_w = 0.000$ | 0.00000 | 4.82088 | 4.97517 | 5.13627 | 5.30367 |
|               | 0.02672 | 4.81486 | 4.96895 | 5.12980 | 5.29697 |
|               | 0.04932 | 4.81005 | 4.96403 | 5.12468 | 5.29176 |
|               | 0.07293 | 4.80539 | 4.95921 | 5.11972 | 5.28663 |
|               | 0.12086 | 4.79702 | 4.95053 | 5.11070 | 5.27727 |
|               | 0.17102 | 4.78973 | 4.94295 | 5.10278 | 5.26909 |
|               | 0.19284 | 4.78704 | 4.94015 | 5.09987 | 5.26606 |
|               | 0.23187 | 4.78303 | 4.93582 | 5.09542 | 5.26130 |
|               | 0.28013 | 4.77927 | 4.93180 | 5.09116 | 5.25679 |

The uncertainty of the mole fraction  $x_w$  is equal to  $\pm 1 \cdot 10^{-3}$ . The uncertainty of molality is equal to  $\pm 1.5 \cdot 10^{-5} \text{ mol} \cdot \text{kg}^{-1}$ .

**Table S9.** The apparent molar isentropic compression of pentaglyme in the DMF + W solvent.

|                        |                                       | $K_{S,\Phi,m} \cdot 10^{14} / \left( \text{m}^3 \cdot \text{Pa}^{-1} \cdot \text{mol}^{-1} \right)$ |          |          |          |
|------------------------|---------------------------------------|-----------------------------------------------------------------------------------------------------|----------|----------|----------|
|                        | $m/(\text{mol} \cdot \text{kg}^{-1})$ | 293.15 K                                                                                            | 298.15 K | 303.15 K | 308.15 K |
| $x_{\text{w}} = 1.000$ | 0.02720                               | −0.44                                                                                               | 0.62     | 1.62     | 2.37     |
|                        | 0.04899                               | −0.45                                                                                               | 0.58     | 1.56     | 2.38     |
|                        | 0.07406                               | −0.52                                                                                               | 0.63     | 1.56     | 2.38     |
|                        | 0.12010                               | −0.58                                                                                               | 0.59     | 1.56     | 2.34     |
|                        | 0.17162                               | −0.63                                                                                               | 0.55     | 1.51     | 2.30     |
|                        | 0.19593                               | −0.66                                                                                               | 0.51     | 1.52     | 2.25     |
|                        | 0.23202                               | −0.69                                                                                               | 0.49     | 1.48     | 2.22     |
|                        | 0.26652                               | −0.70                                                                                               | 0.48     | 1.45     | 2.19     |
| $x_{\text{w}} = 0.980$ | 0.02290                               | 0.75                                                                                                | 1.60     | 2.65     | 3.21     |
|                        | 0.05007                               | 0.88                                                                                                | 1.66     | 2.52     | 3.26     |
|                        | 0.07274                               | 0.79                                                                                                | 1.67     | 2.52     | 3.28     |

|               |         |      |      |      |      |
|---------------|---------|------|------|------|------|
|               | 0.12350 | 0.79 | 1.58 | 2.42 | 3.22 |
|               | 0.17066 | 0.76 | 1.56 | 2.39 | 3.18 |
|               | 0.19792 | 0.74 | 1.55 | 2.39 | 3.17 |
|               | 0.22953 | 0.71 | 1.52 | 2.37 | 3.15 |
|               | 0.26544 | 0.70 | 1.50 | 2.33 | 3.12 |
| $x_W = 0.960$ | 0.02556 | 1.24 | 2.13 | 2.62 | 3.51 |
|               | 0.05031 | 1.21 | 2.12 | 2.71 | 3.51 |
|               | 0.07117 | 1.30 | 2.11 | 2.77 | 3.51 |
|               | 0.12387 | 1.41 | 2.20 | 2.87 | 3.62 |
|               | 0.17126 | 1.49 | 2.27 | 2.92 | 3.68 |
|               | 0.19723 | 1.55 | 2.32 | 2.98 | 3.72 |
|               | 0.23223 | 1.63 | 2.36 | 3.05 | 3.76 |
|               | 0.26541 | 1.68 | 2.43 | 3.09 | 3.81 |
| $x_W = 0.940$ | 0.02549 | 2.22 | 2.68 | 3.54 | 4.41 |
|               | 0.04819 | 2.27 | 2.75 | 3.66 | 4.37 |
|               | 0.07117 | 2.30 | 2.79 | 3.64 | 4.36 |
|               | 0.12085 | 2.41 | 2.86 | 3.71 | 4.38 |
|               | 0.17119 | 2.50 | 2.95 | 3.78 | 4.46 |
|               | 0.19426 | 2.52 | 2.98 | 3.82 | 4.46 |
|               | 0.23011 | 2.59 | 3.05 | 3.88 | 4.52 |
|               | 0.26290 | 2.64 | 3.09 | 3.92 | 4.56 |
| $x_W = 0.920$ | 0.02543 | 3.15 | 3.79 | 4.44 | 4.93 |
|               | 0.04882 | 3.23 | 3.79 | 4.47 | 4.98 |
|               | 0.07199 | 3.30 | 3.84 | 4.53 | 4.98 |
|               | 0.12158 | 3.42 | 3.98 | 4.62 | 5.10 |
|               | 0.17003 | 3.55 | 4.11 | 4.74 | 5.20 |
|               | 0.19963 | 3.61 | 4.18 | 4.83 | 5.29 |
|               | 0.23678 | 3.73 | 4.28 | 4.91 | 5.36 |
|               | 0.26349 | 3.80 | 4.34 | 4.97 | 5.43 |
| $x_W = 0.900$ | 0.02802 | 4.08 | 4.69 | 5.12 | 5.75 |
|               | 0.05067 | 4.13 | 4.69 | 5.16 | 5.75 |
|               | 0.06925 | 4.12 | 4.70 | 5.21 | 5.74 |
|               | 0.12312 | 4.16 | 4.72 | 5.24 | 5.79 |

|               |         |       |       |       |       |
|---------------|---------|-------|-------|-------|-------|
|               | 0.16960 | 4.22  | 4.77  | 5.29  | 5.81  |
|               | 0.19731 | 4.25  | 4.80  | 5.32  | 5.83  |
|               | 0.23046 | 4.29  | 4.82  | 5.34  | 5.86  |
|               | 0.26704 | 4.32  | 4.86  | 5.36  | 5.89  |
| $x_W = 0.800$ | 0.02662 | 7.09  | 7.45  | 7.99  | 8.39  |
|               | 0.05278 | 7.16  | 7.53  | 7.91  | 8.31  |
|               | 0.07110 | 7.19  | 7.57  | 7.98  | 8.33  |
|               | 0.12147 | 7.20  | 7.62  | 8.02  | 8.40  |
|               | 0.17142 | 7.28  | 7.67  | 8.07  | 8.46  |
|               | 0.19612 | 7.30  | 7.70  | 8.11  | 8.51  |
|               | 0.22873 | 7.34  | 7.74  | 8.14  | 8.54  |
|               | 0.26881 | 7.39  | 7.80  | 8.19  | 8.58  |
| $x_W = 0.700$ | 0.02926 | 9.03  | 9.48  | 9.95  | 10.28 |
|               | 0.05503 | 9.10  | 9.48  | 9.96  | 10.38 |
|               | 0.07243 | 9.12  | 9.54  | 9.92  | 10.38 |
|               | 0.12016 | 9.19  | 9.57  | 10.00 | 10.42 |
|               | 0.17029 | 9.22  | 9.63  | 10.06 | 10.48 |
|               | 0.19564 | 9.26  | 9.65  | 10.07 | 10.51 |
|               | 0.23316 | 9.31  | 9.72  | 10.12 | 10.57 |
|               | 0.26766 | 9.35  | 9.75  | 10.16 | 10.61 |
| $x_W = 0.600$ | 0.02648 | 10.48 | 10.83 | 11.19 | 11.59 |
|               | 0.04971 | 10.43 | 10.86 | 11.23 | 11.63 |
|               | 0.07105 | 10.46 | 10.87 | 11.23 | 11.70 |
|               | 0.12025 | 10.53 | 10.91 | 11.32 | 11.72 |
|               | 0.17040 | 10.59 | 10.97 | 11.37 | 11.77 |
|               | 0.19550 | 10.62 | 11.02 | 11.42 | 11.82 |
|               | 0.23012 | 10.66 | 11.05 | 11.45 | 11.85 |
|               | 0.26635 | 10.70 | 11.09 | 11.48 | 11.89 |
| $x_W = 0.500$ | 0.02201 | 11.12 | 11.52 | 11.94 | 12.38 |
|               | 0.05108 | 11.08 | 11.48 | 11.90 | 12.34 |
|               | 0.07481 | 11.07 | 11.47 | 11.89 | 12.33 |
|               | 0.12232 | 11.12 | 11.52 | 11.94 | 12.38 |
|               | 0.17008 | 11.19 | 11.59 | 12.01 | 12.42 |

|               |         |       |       |       |       |
|---------------|---------|-------|-------|-------|-------|
|               | 0.19646 | 11.19 | 11.62 | 12.05 | 12.46 |
|               | 0.23312 | 11.24 | 11.66 | 12.09 | 12.51 |
|               | 0.27166 | 11.28 | 11.71 | 12.14 | 12.54 |
| $x_W = 0.400$ | 0.02618 | 11.31 | 11.72 | 12.14 | 12.58 |
|               | 0.05053 | 11.38 | 11.78 | 12.21 | 12.78 |
|               | 0.07297 | 11.45 | 11.86 | 12.29 | 12.74 |
|               | 0.12102 | 11.49 | 11.89 | 12.32 | 12.78 |
|               | 0.17060 | 11.54 | 11.94 | 12.37 | 12.83 |
|               | 0.19577 | 11.57 | 11.98 | 12.41 | 12.87 |
|               | 0.23433 | 11.61 | 12.02 | 12.45 | 12.91 |
|               | 0.27634 | 11.64 | 12.05 | 12.49 | 12.95 |
| $x_W = 0.300$ | 0.02246 | 11.59 | 12.01 | 12.47 | 12.94 |
|               | 0.05194 | 11.65 | 12.08 | 12.53 | 13.00 |
|               | 0.07419 | 11.65 | 12.08 | 12.53 | 13.09 |
|               | 0.12146 | 11.68 | 12.16 | 12.62 | 13.15 |
|               | 0.16973 | 11.74 | 12.21 | 12.66 | 13.18 |
|               | 0.19491 | 11.78 | 12.22 | 12.71 | 13.22 |
|               | 0.23015 | 11.82 | 12.28 | 12.74 | 13.25 |
|               | 0.27596 | 11.86 | 12.32 | 12.81 | 13.31 |
| $x_W = 0.200$ | 0.02621 | 11.45 | 11.87 | 12.32 | 12.78 |
|               | 0.04975 | 11.39 | 11.94 | 12.39 | 12.85 |
|               | 0.07225 | 11.47 | 11.89 | 12.43 | 12.90 |
|               | 0.12419 | 11.55 | 12.03 | 12.48 | 12.95 |
|               | 0.16946 | 11.60 | 12.06 | 12.51 | 13.03 |
|               | 0.19216 | 11.65 | 12.08 | 12.57 | 13.04 |
|               | 0.23052 | 11.69 | 12.14 | 12.62 | 13.10 |
|               | 0.27650 | 11.76 | 12.21 | 12.66 | 13.14 |
| $x_W = 0.100$ | 0.02383 | 11.14 | 11.57 | 12.01 | 12.46 |
|               | 0.05002 | 11.13 | 11.56 | 11.99 | 12.45 |
|               | 0.07364 | 11.16 | 11.58 | 12.02 | 12.48 |
|               | 0.12204 | 11.25 | 11.68 | 12.12 | 12.58 |
|               | 0.17099 | 11.31 | 11.74 | 12.18 | 12.65 |
|               | 0.19562 | 11.35 | 11.78 | 12.23 | 12.70 |

|               |         |       |       |       |       |
|---------------|---------|-------|-------|-------|-------|
|               | 0.23233 | 11.45 | 11.85 | 12.30 | 12.77 |
|               | 0.27585 | 11.52 | 11.95 | 12.41 | 12.89 |
| $x_w = 0.000$ | 0.02386 | 10.64 | 11.03 | 11.44 | 11.85 |
|               | 0.05145 | 10.67 | 11.06 | 11.47 | 11.88 |
|               | 0.07363 | 10.69 | 11.09 | 11.49 | 11.91 |
|               | 0.12070 | 10.81 | 11.21 | 11.61 | 12.11 |
|               | 0.17089 | 10.99 | 11.38 | 11.80 | 12.23 |
|               | 0.19481 | 11.03 | 11.43 | 11.85 | 12.33 |
|               | 0.23328 | 11.15 | 11.55 | 11.97 | 12.41 |
|               | 0.27780 | 11.28 | 11.68 | 12.10 | 12.56 |

The uncertainty of the mole fraction  $x_w$  is equal to  $\pm 1 \cdot 10^{-3}$ . The uncertainty of molality is equal to  $\pm 1.5 \cdot 10^{-5} \text{ mol} \cdot \text{kg}^{-1}$ .

**Table S10.** The apparent molar isentropic compression of hexaglyme in the DMF + W solvent.

| $K_{S,\Phi,m} \cdot 10^{14} / (\text{m}^3 \cdot \text{Pa}^{-1} \cdot \text{mol}^{-1})$ |                                         |          |          |          |          |
|----------------------------------------------------------------------------------------|-----------------------------------------|----------|----------|----------|----------|
|                                                                                        | $m / (\text{mol} \cdot \text{kg}^{-1})$ | 293.15 K | 298.15 K | 303.15 K | 308.15 K |
| $x_w = 1.000$                                                                          | 0.02654                                 | −0.57    | 0.54     | 1.82     | 2.82     |
|                                                                                        | 0.04718                                 | −0.64    | 0.58     | 1.76     | 2.74     |
|                                                                                        | 0.07348                                 | −0.69    | 0.58     | 1.71     | 2.70     |
|                                                                                        | 0.12072                                 | −0.72    | 0.52     | 1.62     | 2.66     |
|                                                                                        | 0.16577                                 | −0.76    | 0.48     | 1.60     | 2.57     |
|                                                                                        | 0.19290                                 | −0.77    | 0.44     | 1.55     | 2.54     |
|                                                                                        | 0.23377                                 | −0.81    | 0.40     | 1.51     | 2.50     |
|                                                                                        | 0.26703                                 | −0.84    | 0.38     | 1.47     | 2.47     |
| $x_w = 0.980$                                                                          | 0.02630                                 | 0.76     | 1.73     | 2.88     | 3.59     |
|                                                                                        | 0.04688                                 | 0.77     | 1.73     | 2.77     | 3.67     |
|                                                                                        | 0.07142                                 | 0.81     | 1.72     | 2.74     | 3.60     |
|                                                                                        | 0.11931                                 | 0.73     | 1.70     | 2.72     | 3.58     |
|                                                                                        | 0.17341                                 | 0.69     | 1.65     | 2.66     | 3.51     |
|                                                                                        | 0.19399                                 | 0.67     | 1.63     | 2.63     | 3.51     |
|                                                                                        | 0.22823                                 | 0.63     | 1.60     | 2.61     | 3.47     |
|                                                                                        | 0.26482                                 | 0.61     | 1.57     | 2.58     | 3.42     |

|               |         |      |      |      |      |
|---------------|---------|------|------|------|------|
| $x_W = 0.960$ | 0.02806 | 1.23 | 2.26 | 3.11 | 3.93 |
|               | 0.04993 | 1.30 | 2.34 | 3.07 | 3.88 |
|               | 0.06868 | 1.32 | 2.33 | 3.11 | 3.88 |
|               | 0.11870 | 1.41 | 2.43 | 3.14 | 3.97 |
|               | 0.16749 | 1.52 | 2.51 | 3.23 | 4.00 |
|               | 0.19471 | 1.57 | 2.54 | 3.25 | 4.03 |
|               | 0.23961 | 1.66 | 2.62 | 3.32 | 4.08 |
|               | 0.26936 | 1.70 | 2.66 | 3.35 | 4.11 |
| $x_W = 0.940$ | 0.02764 | 2.40 | 3.03 | 3.84 | 4.66 |
|               | 0.04917 | 2.42 | 3.21 | 3.92 | 4.73 |
|               | 0.06764 | 2.54 | 3.22 | 3.98 | 4.82 |
|               | 0.11687 | 2.79 | 3.47 | 4.17 | 4.95 |
|               | 0.16487 | 3.03 | 3.69 | 4.37 | 5.14 |
|               | 0.19164 | 3.16 | 3.82 | 4.47 | 5.25 |
|               | 0.23578 | 3.41 | 4.03 | 4.66 | 5.41 |
|               | 0.26501 | 3.56 | 4.17 | 4.78 | 5.51 |
| $x_W = 0.920$ | 0.02492 | 3.43 | 4.28 | 4.96 | 5.65 |
|               | 0.04866 | 3.56 | 4.24 | 4.93 | 5.64 |
|               | 0.07143 | 3.59 | 4.28 | 4.99 | 5.71 |
|               | 0.11787 | 3.68 | 4.38 | 5.05 | 5.74 |
|               | 0.17385 | 3.80 | 4.47 | 5.13 | 5.80 |
|               | 0.20086 | 3.85 | 4.52 | 5.17 | 5.85 |
|               | 0.22911 | 3.91 | 4.57 | 5.23 | 5.88 |
|               | 0.25937 | 3.96 | 4.63 | 5.28 | 5.92 |
| $x_W = 0.900$ | 0.02702 | 4.36 | 4.97 | 5.61 | 6.09 |
|               | 0.04911 | 4.36 | 5.02 | 5.62 | 6.22 |
|               | 0.06985 | 4.45 | 5.08 | 5.67 | 6.28 |
|               | 0.11608 | 4.58 | 5.24 | 5.81 | 6.39 |
|               | 0.16915 | 4.73 | 5.39 | 5.96 | 6.52 |
|               | 0.19264 | 4.79 | 5.46 | 6.03 | 6.56 |
|               | 0.23327 | 4.93 | 5.58 | 6.14 | 6.69 |
|               | 0.26404 | 5.02 | 5.67 | 6.23 | 6.75 |
| $x_W = 0.800$ | 0.02631 | 7.82 | 8.34 | 8.74 | 9.16 |

|               |         |       |       |       |       |
|---------------|---------|-------|-------|-------|-------|
|               | 0.05015 | 7.85  | 8.31  | 8.80  | 9.24  |
|               | 0.06965 | 7.92  | 8.37  | 8.79  | 9.25  |
|               | 0.12002 | 7.99  | 8.42  | 8.87  | 9.32  |
|               | 0.16883 | 8.04  | 8.49  | 8.93  | 9.39  |
|               | 0.19503 | 8.07  | 8.51  | 8.95  | 9.41  |
|               | 0.23372 | 8.13  | 8.58  | 9.01  | 9.48  |
|               | 0.26945 | 8.17  | 8.62  | 9.06  | 9.53  |
| $x_W = 0.700$ | 0.02721 | 10.21 | 10.70 | 11.23 | 11.60 |
|               | 0.05019 | 10.30 | 10.81 | 11.26 | 11.64 |
|               | 0.07042 | 10.32 | 10.78 | 11.27 | 11.71 |
|               | 0.11807 | 10.43 | 10.89 | 11.33 | 11.75 |
|               | 0.16552 | 10.49 | 10.95 | 11.40 | 11.84 |
|               | 0.19639 | 10.52 | 10.98 | 11.45 | 11.88 |
|               | 0.23262 | 10.58 | 11.05 | 11.50 | 11.95 |
|               | 0.26930 | 10.64 | 11.11 | 11.57 | 12.00 |
| $x_W = 0.600$ | 0.02582 | 11.72 | 12.10 | 12.50 | 12.94 |
|               | 0.04807 | 11.67 | 12.15 | 12.56 | 13.00 |
|               | 0.07046 | 11.73 | 12.18 | 12.58 | 13.10 |
|               | 0.11933 | 11.81 | 12.23 | 12.69 | 13.13 |
|               | 0.16988 | 11.88 | 12.29 | 12.73 | 13.21 |
|               | 0.19224 | 11.92 | 12.33 | 12.77 | 13.25 |
|               | 0.23002 | 11.96 | 12.39 | 12.86 | 13.31 |
|               | 0.27268 | 12.04 | 12.47 | 12.91 | 13.38 |
| $x_W = 0.500$ | 0.02620 | 12.33 | 12.77 | 13.22 | 13.71 |
|               | 0.04908 | 12.36 | 12.80 | 13.37 | 13.86 |
|               | 0.07135 | 12.39 | 12.91 | 13.37 | 13.86 |
|               | 0.11924 | 12.47 | 12.96 | 13.43 | 13.92 |
|               | 0.16660 | 12.54 | 13.01 | 13.52 | 14.01 |
|               | 0.19558 | 12.57 | 13.07 | 13.57 | 14.07 |
|               | 0.23001 | 12.62 | 13.12 | 13.62 | 14.12 |
|               | 0.27069 | 12.69 | 13.18 | 13.68 | 14.18 |
| $x_W = 0.400$ | 0.02533 | 12.69 | 13.14 | 13.60 | 14.10 |
|               | 0.04807 | 12.67 | 13.12 | 13.57 | 14.07 |

|               |         |       |       |       |       |
|---------------|---------|-------|-------|-------|-------|
|               | 0.07303 | 12.70 | 13.15 | 13.69 | 14.20 |
|               | 0.12068 | 12.77 | 13.27 | 13.74 | 14.24 |
|               | 0.16770 | 12.86 | 13.31 | 13.78 | 14.29 |
|               | 0.19931 | 12.90 | 13.35 | 13.82 | 14.33 |
|               | 0.23383 | 12.96 | 13.39 | 13.87 | 14.38 |
|               | 0.27474 | 13.02 | 13.46 | 13.94 | 14.45 |
| $x_W = 0.300$ | 0.02667 | 12.72 | 13.19 | 13.68 | 14.18 |
|               | 0.05097 | 12.66 | 13.13 | 13.62 | 14.12 |
|               | 0.07071 | 12.72 | 13.18 | 13.67 | 14.18 |
|               | 0.11946 | 12.74 | 13.21 | 13.70 | 14.20 |
|               | 0.16816 | 12.84 | 13.31 | 13.80 | 14.31 |
|               | 0.19414 | 12.88 | 13.32 | 13.81 | 14.32 |
|               | 0.23318 | 12.93 | 13.38 | 13.87 | 14.39 |
|               | 0.27451 | 12.99 | 13.47 | 13.94 | 14.45 |
| $x_W = 0.200$ | 0.02406 | 12.35 | 12.79 | 13.26 | 13.77 |
|               | 0.05074 | 12.33 | 12.90 | 13.38 | 13.88 |
|               | 0.06912 | 12.39 | 12.83 | 13.40 | 13.91 |
|               | 0.12024 | 12.49 | 12.94 | 13.41 | 13.98 |
|               | 0.17291 | 12.58 | 13.03 | 13.51 | 14.06 |
|               | 0.19690 | 12.64 | 13.09 | 13.57 | 14.08 |
|               | 0.23388 | 12.70 | 13.16 | 13.63 | 14.15 |
|               | 0.26538 | 12.77 | 13.20 | 13.68 | 14.19 |
| $x_W = 0.100$ | 0.02556 | 11.98 | 12.40 | 12.87 | 13.35 |
|               | 0.04951 | 12.14 | 12.56 | 13.04 | 13.52 |
|               | 0.07371 | 12.11 | 12.54 | 13.01 | 13.49 |
|               | 0.12028 | 12.22 | 12.65 | 13.13 | 13.61 |
|               | 0.16628 | 12.37 | 12.77 | 13.25 | 13.74 |
|               | 0.19362 | 12.42 | 12.87 | 13.31 | 13.80 |
|               | 0.23091 | 12.52 | 12.95 | 13.43 | 13.92 |
|               | 0.28006 | 12.64 | 13.08 | 13.54 | 14.04 |
| $x_W = 0.000$ | 0.02672 | 11.48 | 11.90 | 12.31 | 12.78 |
|               | 0.04932 | 11.61 | 12.03 | 12.45 | 12.92 |
|               | 0.07293 | 11.68 | 12.11 | 12.53 | 13.00 |

|         |       |       |       |       |
|---------|-------|-------|-------|-------|
| 0.12086 | 11.79 | 12.22 | 12.71 | 13.18 |
| 0.17102 | 11.97 | 12.45 | 12.88 | 13.36 |
| 0.19284 | 12.07 | 12.51 | 12.95 | 13.42 |
| 0.23187 | 12.23 | 12.67 | 13.12 | 13.60 |
| 0.28013 | 12.41 | 12.85 | 13.31 | 13.79 |

The uncertainty of the mole fraction  $x_w$  is equal to  $\pm 1 \cdot 10^{-3}$ . The uncertainty of molality is equal to  $\pm 1.5 \cdot 10^{-5} \text{ mol} \cdot \text{kg}^{-1}$ .

#### NMR Spectroscopy.

NMR spectra were recorded using a Bruker AVANCE III spectrometer equipped with a 5 mm TBI probe at 600.13 MHz. The  $^1\text{H}$  chemical shifts ( $\delta$  in parts per million) were specified with respect to the  $\text{CDCl}_3$  (7.26 ppm) signal as a reference. The 1D  $^1\text{H}$  NMR spectra were measured at 302 K by means of the  $90^\circ$  single-pulse experiment (Bruker pulprog: zgig) with  $^{13}\text{C}$  ‘garp’ decoupling mode. The  $90^\circ$  pulse width for each sample was determined by prorating the measured  $360^\circ$  pulse width ( $p_{90} = \frac{1}{4} \times p_{360}$ ). The gain of the receiver was set to 45 for all  $^1\text{H}$  NMR measurements. A total number of 16 transients recorded at an acquisition time of 3.0 s and a relaxation delay of 24 s, (5 times the longest  $T_1$  observed) was obtained. The other parameters were: spectral width 12500.00 Hz, FID resolution 0.17 Hz. Frequency was tuned and impedance matched before each measurement run. The 1D NMR data analysis was performed using TopSpin software (v.2.1 p4, Bruker BioSpin). For  $^1\text{H}$  NMR spectra analysis, standard Fourier transform (128 k digital data point), without line broadening and Gaussian factor (line broadening = 0 Hz, Gaussian factor = 0) was applied. The digital resolution was 0.095 Hz/pt (0.22 ppb/pt at 600.13 MHz). A fifth-order polynomial baseline correction was applied, after manual phasing. Dimethyl terephthalate (Sigma-Aldrich, TraceCert®) was used as internal standard.

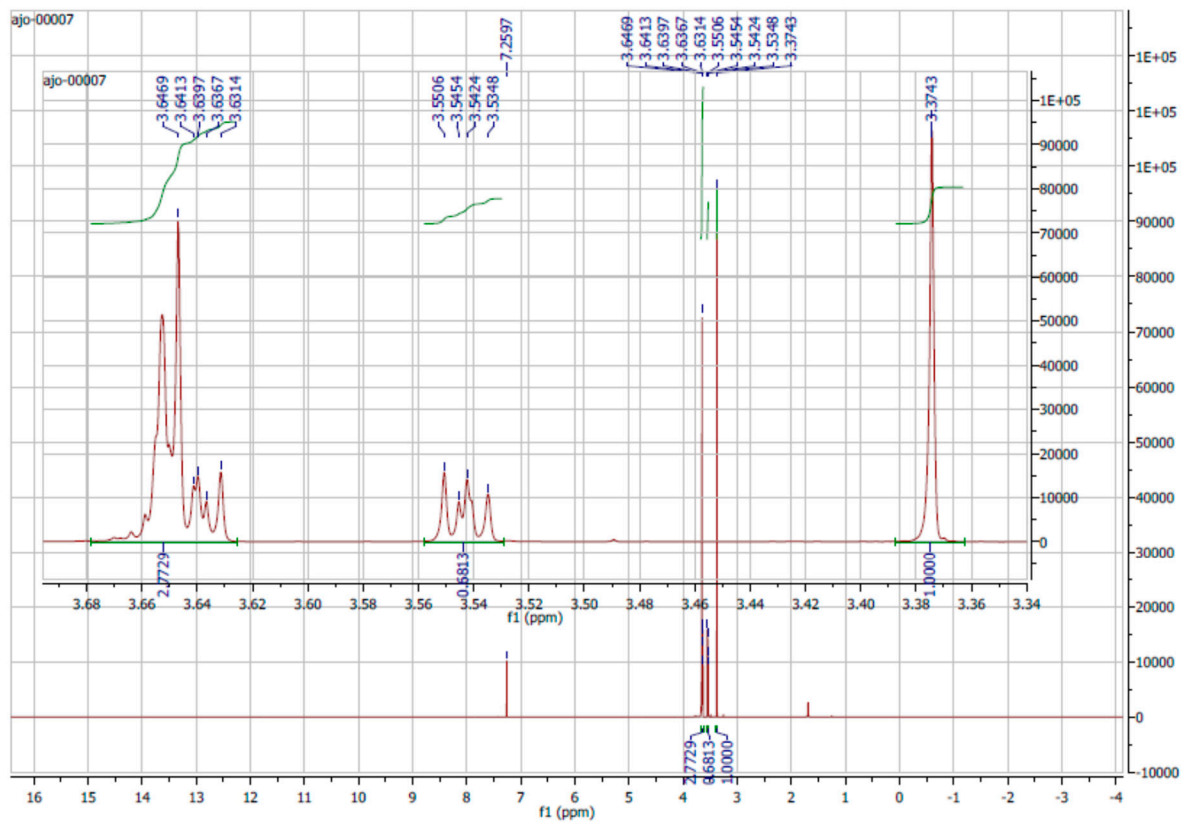

pentaglyme

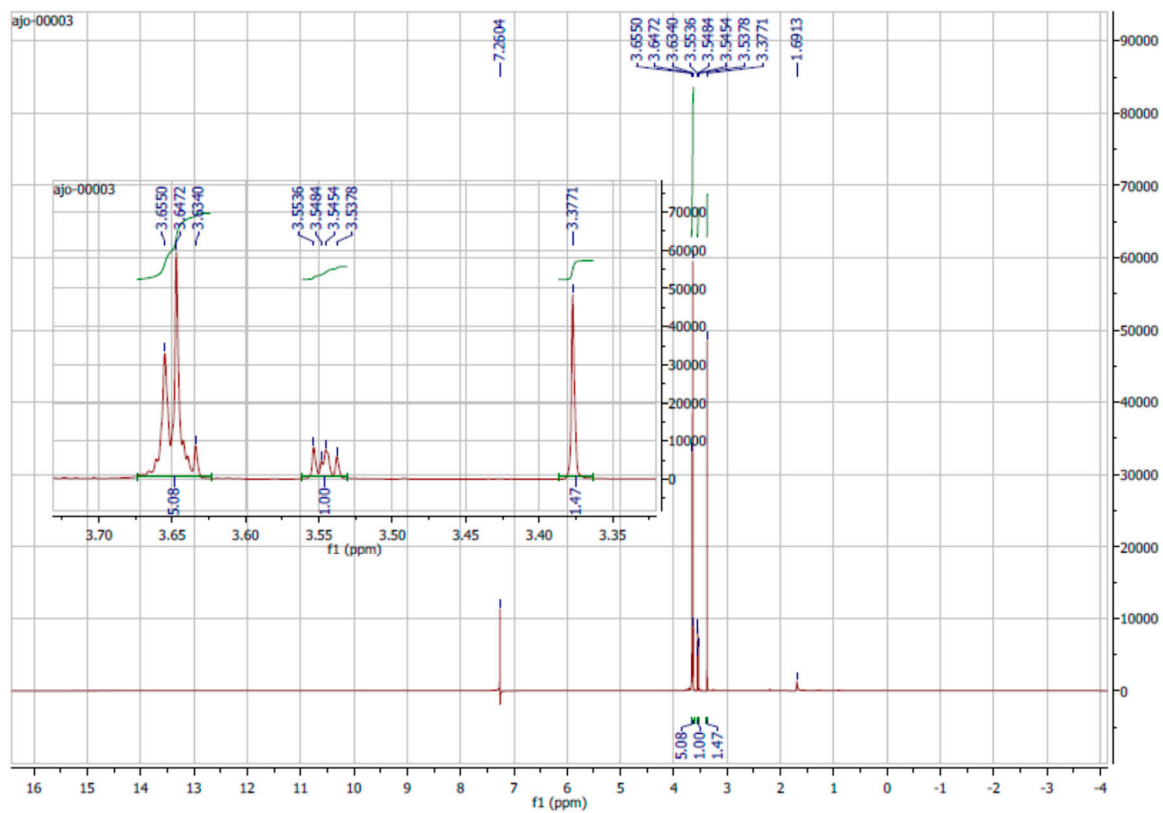

heksaglyme
